# Supplementary material
Source: publisher figshare collection journal article supplement (https://acs.figshare.com/ndownloader/files/15178214)
Supplement: Supplementary file 1 [file 15178214]

## Sheet: replicate1 FC>2 proteins
Protein IDs	Protein names	Gene names	Intensity EV	Intensity NFX1_1	FC(NFX11/Con)
E5RIU6	Cyclin-dependent kinase 1	CDK1	1173494	3362100	2.86503
A0A024R4E5	Vigilin	HDLBP	13755000	58318000	4.23977
A0A024R4M0	40S ribosomal protein S9	RPS9	102900000	898390000	8.73071
H0YN88	40S ribosomal protein S17	RPS17	18658000	124500000	6.67274
A0A087WSW7	Lymphoid-specific helicase	HELLS	1173494	3190500	2.7188
G3V2E8	Alpha-actinin-1	ACTN1	1173494	3046400	2.59601
A0A087WTP3	Far upstream element-binding protein 2	KHSRP	5320800	39881000	7.4953
A0A087WTV6	Pyrroline-5-carboxylate reductase	PYCR2	1173494	3824700	3.25924
A0A087WUK2	Heterogeneous nuclear ribonucleoprotein D-like	HNRNPDL	1173494	41846000	35.6593
E7ETK0	40S ribosomal protein S24	RPS24	25545000	112140000	4.3899
A0A087WUT6	Eukaryotic translation initiation factor 5B	EIF5B	2368000	88191000	37.2428
A0A087WVM4	Monofunctional C1-tetrahydrofolate synthase, mitochondrial	MTHFD1L	1533800	33180000	21.6325
A0A087WVQ6	Clathrin heavy chain	CLTC	6935900	45055000	6.49591
A0A087WW66	26S proteasome non-ATPase regulatory subunit 1	PSMD1	1173494	9256800	7.88824
A0A087WX71		ESF1	1173494	20389000	17.3746
A0A087WXM6	60S ribosomal protein L17	RPL17	15323000	360000000	23.4941
A0A087WYC1	Heat shock 70 kDa protein 4	HSPA4	1173494	26863000	22.8915
A0A087WYC8	Regulator of nonsense transcripts 3B	UPF3B	1173494	9905400	8.44095
A0A087WYN9	ATP-dependent RNA helicase DHX29	DHX29	1418800	20977000	14.785
A0A087WZK9	Eukaryotic translation initiation factor 3 subunit H	EIF3H	1173494	37013000	31.5409
Q5JZB7	Spindlin-2B	SPIN2B	1173494	2541700	2.16593
A0A1B0GUB0	Ryanodine receptor 3	RYR3	1173494	6227900	5.30714
A0A087X0H9	RNA-binding protein 26	RBM26	1173494	9542100	8.13136
A0A087X0M4	Kanadaptin	SLC4A1AP	9822700	74217000	7.55566
A0A087X0X3	Heterogeneous nuclear ribonucleoprotein M	HNRNPM	52051000	219230000	4.21183
A0A087X1A5	Double-stranded RNA-binding protein Staufen homolog 1	STAU1	4830700	13276000	2.74826
A0A087X1B2	U4/U6.U5 tri-snRNP-associated protein 2	USP39	1173494	44889000	38.2524
A0A087X1H5	Arf-GAP with coiled-coil, ANK repeat and PH domain-containing protein 2	ACAP2	57041000	278490000	4.88228
A0A087X2D0	Serine/arginine-rich splicing factor 3	SRSF3	10594000	43727000	4.12753
A0A087X2D5	39S ribosomal protein L45, mitochondrial	MRPL45	1173494	57643000	49.1208
F1T0B3	ATP-dependent RNA helicase DDX1	DDX1	25303000	125650000	4.96581
A0A087X2I1	26S protease regulatory subunit 10B	PSMC6	1173494	14567000	12.4134
A0A0A0MR66	RNA-binding protein 10	RBM10	1926800000	4206200000	2.183
A0A0A0MRA5	Heterogeneous nuclear ribonucleoprotein U-like protein 1	HNRNPUL1	1173494	4722200	4.02405
F6S8N6	Protein-L-isoaspartate O-methyltransferase	PCMT1	1173494	5355900	4.56406
H7C4N2	Plastin-3	PLS3	1173494	15182000	12.9374
C9JP03	SLAIN motif-containing protein 1	SLAIN1	1173494	5319500	4.53304
A0A0A0MSX9	Isoleucine--tRNA ligase, cytoplasmic	IARS	44130000	180150000	4.08226
A0A0A0MT59	Mortality factor 4-like protein 2	MORF4L2	1173494	4659600	3.97071
A0A0A6YYJ8	Putative RNA-binding protein Luc7-like 2	LUC7L2	1558200	3643400	2.33821
A0A0B4J1Z1	Serine/arginine-rich splicing factor 7	SRSF7	33838000	101000000	2.98481
A0A0B4J203	Pre-mRNA 3-end-processing factor FIP1	FIP1L1	1173494	3455000	2.9442
K7EM56	40S ribosomal protein S15	RPS15	1173494	123610000	105.335
A0A0C4DG98	THO complex subunit 2	THOC2	1173494	12736000	10.8531
A0A0C4DH31	Ig heavy chain V-I region V35	IGHV1-18	1173494	7055600	6.01247
A0A0D9SEM9		DDX39A	1173494	5845300	4.98111
C9JUG7	F-actin-capping protein subunit alpha-1	CAPZA2	5609300	13781000	2.45681
A0A0D9SEU5	Ran-binding protein 10	RANBP10	1374400	7708800	5.60885
A0A0D9SFB3	ATP-dependent RNA helicase DDX3X	DDX3X	53539000	442870000	8.27191
Q5JRC6	PHD finger protein 6	PHF6	1173494	3667600	3.12537
A0A0G2JIW1	Heat shock 70 kDa protein 1B	HSPA1B	306050000	1183500000	3.86702
E9PL19	Poly(U)-binding-splicing factor PUF60	PUF60	1173494	4259500	3.62976
A0A0J9YW13	RNA-binding protein 8A	RBM8A	1173494	7186100	6.12368
A0A0R4J2E8	Matrin-3	MATR3	5806000	95046000	16.3703
E3W994	CLIP-associating protein 2	CLASP2	1937100	14631000	7.55304
A0A0U1RR30	Transcriptional repressor p66-beta	GATAD2B	1457700	8035700	5.51259
A0A1B0GWE0	Dedicator of cytokinesis protein 7	DOCK7	1173494	3649600	3.11003
A0A1X7SBZ2	Probable ATP-dependent RNA helicase DDX17	DDX17	31518000	484520000	15.3728
A0A1W2PQI2	Serine/threonine-protein phosphatase 2A 55 kDa regulatory subunit B alpha isoform	PPP2R2A	1173494	8015800	6.83071
A0A1W2PQS1	26S protease regulatory subunit 7	PSMC2	1173494	10496000	8.94423
A0A1W2PRV5	Survival motor neuron protein	SMN1	1173494	11055000	9.42059
A2IDC6	39S ribosomal protein L28, mitochondrial	MRPL28	1173494	23978000	20.433
A5YKK6	CCR4-NOT transcription complex subunit 1	CNOT1	1173494	7120400	6.06769
A6NHL2	Tubulin alpha chain-like 3	TUBAL3	1173494	16261000	13.8569
J3KTL8	Structural maintenance of chromosomes flexible hinge domain-containing protein 1	SMCHD1	1207100	3473200	2.87731
A6NJD9	39S ribosomal protein L23, mitochondrial	MRPL23	20629000	54440000	2.639
A8K968	Band 4.1-like protein 3	EPB41L3	12660000	56688000	4.47773
H7BY10	60S ribosomal protein L23a	RPL23A	44807000	193340000	4.31495
Q49AN9	Small nuclear ribonucleoprotein G	SNRPG	1173494	21983000	18.7329
B0QY89	Eukaryotic translation initiation factor 3 subunit L	EIF3L	3556700	142300000	40.009
B0QYK0	RNA-binding protein EWS	EWSR1	30147000	83561000	2.77178
B0YIW6	Coatomer subunit delta	ARCN1	1173494	5128500	4.37028
B1AHD1	NHP2-like protein 1	NHP2L1	1173494	3689100	3.14369
B1AK87	F-actin-capping protein subunit beta	CAPZB	1173494	15372000	13.0993
H0Y6Y8	39S ribosomal protein L43, mitochondrial	MRPL43	14390000	34450000	2.39402
B1AM31	Axonemal dynein light chain domain-containing protein 1	AXDND1	10579000	30891000	2.92003
B1AMU5	Palmitoyltransferase	ZDHHC16	13030000	39774000	3.05249
B1ANR0	Polyadenylate-binding protein	PABPC4	1173494	182310000	155.357
G3V4W0	Heterogeneous nuclear ribonucleoproteins C1/C2	HNRNPC	30953000	167950000	5.42597
B3KXD6	Pescadillo homolog	PES1	1173494	6058500	5.16279
H7C048	SWI/SNF-related matrix-associated actin-dependent regulator of chromatin subfamily E member 1	SMARCE1	1173494	3953600	3.36908
B4DY09	Interleukin enhancer-binding factor 2	ILF2	28554000	119300000	4.17805
B5MBZ0	Echinoderm microtubule-associated protein-like 4	EML4	1173494	2765100	2.3563
H0YFC6	GTP-binding nuclear protein Ran	RAN	1173494	23689000	20.1867
H0YHC3	Nucleosome assembly protein 1-like 1	NAP1L1	1173494	14458000	12.3205
E7ENZ3	T-complex protein 1 subunit epsilon	CCT5	15160000	162310000	10.7065
B8ZZ54	10 kDa heat shock protein, mitochondrial	HSPE1	11726000	23636000	2.01569
B8ZZV5	39S ribosomal protein L30, mitochondrial	MRPL30	1173494	7452700	6.35086
B9A062	Bifunctional methylenetetrahydrofolate dehydrogenase/cyclohydrolase, mitochondrial	MTHFD2	1173494	5803100	4.94515
H7C0A0	AP-4 complex subunit mu-1	AP4M1	1173494	10286000	8.76528
H0YAL7	Eukaryotic translation elongation factor 1 epsilon-1	EEF1E1	1173494	16877000	14.3818
F8WCJ1	Eukaryotic translation initiation factor 5A	EIF5A2	4743000	28931000	6.09973
C9J8D4	Mannosyl-oligosaccharide glucosidase	MOGS	1173494	8664300	7.38334
C9J8Q5	Succinate-semialdehyde dehydrogenase, mitochondrial	ALDH5A1	8724500	44395000	5.08854
C9J8T0	Selenocysteine-specific elongation factor	EEFSEC	1173494	3658600	3.1177
C9JJX6	Armadillo repeat protein deleted in velo-cardio-facial syndrome	ARVCF	1173494	9928200	8.46038
C9JXB8	60S ribosomal protein L24	RPL24	29621000	121320000	4.09574
C9JSX3		PRMT5	1173494	4740300	4.03948
C9JZ20	Prohibitin	PHB	2731700	36104000	13.2167
D6R937	Aminoacyl tRNA synthase complex-interacting multifunctional protein 1	AIMP1	3995900	13349000	3.34067
D6R9A6	High mobility group protein B2	HMGB2	1173494	7277900	6.20191
D6R9P3	Heterogeneous nuclear ribonucleoprotein A/B	HNRNPAB	34596000	115730000	3.34518
D6RAN8	39S ribosomal protein L27, mitochondrial	MRPL27	2046300	12515000	6.11592
D6RBE9	Annexin	ANXA5	1173494	11044000	9.41121
D6RBW1	Eukaryotic translation initiation factor 4E	EIF4E	1173494	19798000	16.871
D6RC14	39S ribosomal protein L3, mitochondrial	MRPL3	1173494	10637000	9.06438
D6RH20	28S ribosomal protein S27, mitochondrial	MRPS27	1173494	8996000	7.666
D6RIY6	Exosome complex component RRP45	EXOSC9	1173494	28190000	24.0223
E5RJR5	S-phase kinase-associated protein 1	SKP1	1173494	8323800	7.09318
H0YLJ8	Ras-related protein Rab-10	RAB8B	1173494	8714900	7.42645
E7EPN9	Protein PRRC2C	PRRC2C	1173494	10276000	8.75676
E7EQS8	Methylcytosine dioxygenase TET2	TET2	22732000	75535000	3.32285
E7ERM3	Angiomotin	AMOT	1173494	3104800	2.64577
E7ESL0	39S ribosomal protein L22, mitochondrial	MRPL22	1173494	14483000	12.3418
F8W9Y9	Metastasis-associated protein MTA1	MTA1	1173494	2981000	2.54028
J3KQ96	Treacle protein	TCOF1	5419300	27816000	5.13277
E7EU96	Casein kinase II subunit alpha 3	CSNK2A1	1173494	6933100	5.90808
E7EUU4	Eukaryotic translation initiation factor 4 gamma 1	EIF4G1	9392200	463650000	49.3654
E7EX90	Dynactin subunit 1	DCTN1	9488600	28420000	2.99517
E9PB61	THO complex subunit 4	ALYREF	16174000	55394000	3.42488
E9PF19	Transducin beta-like protein 2	TBL2	1173494	5013000	4.27186
E9PH82	Protein FAM98A	FAM98A	3714600	13674000	3.68115
E9PK54		HSPA8	1173494	13643000	11.626
E9PK91		BCLAF1	1173494	10033000	8.54968
E9PKD5	26S protease regulatory subunit 6A	PSMC3	1173494	10100000	8.60678
E9PKG1	Protein arginine N-methyltransferase 1	PRMT1	7832400	241160000	30.7901
E9PKP7	Nucleolar transcription factor 1	UBTF	1173494	5261800	4.48387
E9PLL6	60S ribosomal protein L27a	RPL27A	47978000	172180000	3.58873
E9PMD4	FACT complex subunit SSRP1	SSRP1	1173494	6914000	5.89181
F5H1C3	Enolase	ENO2	18262000	65690000	3.59709
F5H1Y3	Flap endonuclease 1	FEN1	1173494	10031000	8.54798
F5H4S8		NFATC1	21334000	54425000	2.55109
F5H702	39S ribosomal protein L48, mitochondrial	MRPL48	1173494	51750000	44.0991
F6SS63		TAB3	12131000	58334000	4.80867
F6VRR5	Polymerase delta-interacting protein 3	POLDIP3	3397100	37531000	11.048
F8VPD4	CAD protein	CAD	1173494	17622000	15.0167
H0YH87	Ataxin-2	ATXN2	1173494	10974000	9.35156
F8VRR3	Methionine aminopeptidase 2	METAP2	1173494	4002000	3.41033
F8VR82	Serine/threonine-protein phosphatase	PPP1CC	1173494	7329600	6.24596
F8VVM2	Phosphate carrier protein, mitochondrial	SLC25A3	1173494	32039000	27.3022
F8VZQ9	SAP domain-containing ribonucleoprotein	SARNP	1173494	4136200	3.52469
H3BRU6	Poly(rC)-binding protein 2	PCBP2	13011000	99646000	7.6586
F8W6I7	Heterogeneous nuclear ribonucleoprotein A1	HNRNPA1	187270000	736060000	3.93047
F8W930	Insulin-like growth factor 2 mRNA-binding protein 2	IGF2BP2	1173494	6902200	5.88175
F8WAE5	Eukaryotic translation initiation factor 2A	EIF2A	1173494	13960000	11.8961
F8WJN3	Cleavage and polyadenylation specificity factor subunit 6	CPSF6	1173494	6402900	5.45627
G3V153	Caprin-1	CAPRIN1	2570700	14269000	5.55063
G3V3U4	Proteasome subunit alpha type	PSMA6	5147200	14770000	2.86952
G3V461	Creatine kinase B-type	CKB	1173494	10303000	8.77976
G3V4C6	UPF0568 protein C14orf166	C14orf166	4022300	26827000	6.66957
G3V5V3	Nuclear export mediator factor NEMF	NEMF	1173494	3762800	3.20649
G5E933	Myotubularin-related protein 5	SBF1	1173494	3303800	2.81535
G8JLB6	Heterogeneous nuclear ribonucleoprotein H	HNRNPH1	377780000	980560000	2.59558
X6RM00	ELKS/Rab6-interacting/CAST family member 1	ERC1	1173494	4064900	3.46393
H0Y2W2		ATAD3A	1173494	10260000	8.74312
H0Y4R1	Inosine-5-monophosphate dehydrogenase 2	IMPDH2	1173494	3634600	3.09725
H0Y4X3	RNA-binding protein 39	RBM39	3300500	23741000	7.19315
H0Y5B4	60S ribosomal protein L36a-like	RPL36A	1173494	27463000	23.4028
H0Y5F5	Polyadenylate-binding protein	PABPC4	1173494	7451600	6.34993
H0Y720	Trinucleotide repeat-containing gene 6B protein	TNRC6B	1389100	4143700	2.98301
H0YE76	Activating signal cointegrator 1 complex subunit 1	ASCC1	1173494	14367000	12.2429
J3KNJ2	Eukaryotic translation initiation factor 3 subunit M	EIF3M	1173494	23337000	19.8868
H0YDD4	Acetyltransferase component of pyruvate dehydrogenase complex	DLAT	8198800	51076000	6.22969
H0YEL0	Gem-associated protein 2	GEMIN2	1173494	7059600	6.01588
H0YHA7	60S ribosomal protein L18	RPL18	61083000	308180000	5.04527
H0YKD8	60S ribosomal protein L28	RPL28	17731000	89107000	5.02549
H0YMZ1	Proteasome subunit alpha type	PSMA4	1173494	76495000	65.1857
H0YLA2	Signal recognition particle 14 kDa protein	SRP14	1173494	15693000	13.3729
H3BLV9	SRSF protein kinase 1	SRPK1	6165400	43367000	7.03393
H3BPG5	RNA-binding protein with serine-rich domain 1	RNPS1	1173494	5386400	4.59005
H3BV41	Cleavage and polyadenylation specificity factor subunit 5	NUDT21	1173494	5359500	4.56713
H3BPE7	RNA-binding protein FUS	FUS	18401000	74215000	4.0332
H3BQZ7	Heterogeneous nuclear ribonucleoprotein U-like protein 2	HNRNPUL2-BSCL2	1173494	9660900	8.23259
H3BS42	Zinc finger protein 768	ZNF768	1173494	4025800	3.43061
H3BUF6	Ataxin-2-like protein	ATXN2L	1173494	3962700	3.37684
H7BXY3	Putative ATP-dependent RNA helicase DHX30	DHX30	6333500	111660000	17.6301
H7C0C0	General transcription factor 3C polypeptide 3	GTF3C3	1173494	37082000	31.5997
H7C0G4	Probable 18S rRNA (guanine-N(7))-methyltransferase	WBSCR22	1173494	5770800	4.91762
I3L1P8	Mitochondrial 2-oxoglutarate/malate carrier protein	SLC25A11	1181700	5449900	4.61192
I3L2C7	Gem-associated protein 4	GEMIN4	3065700	27959000	9.11994
J3KNN5	Probable ATP-dependent RNA helicase DDX41	DDX41	12969000	92710000	7.14859
J3KPH3	Protein FAM208B	FAM208B	1173494	6217500	5.29828
J3KPS3	Fructose-bisphosphate aldolase	ALDOA	2947000	69414000	23.5541
J3KS15	Peptidyl-tRNA hydrolase ICT1, mitochondrial	ICT1	3270000	89695000	27.4297
J3KTA4	Probable ATP-dependent RNA helicase DDX5	DDX5	10136000	155350000	15.3266
J3KTL2	Serine/arginine-rich splicing factor 1	SRSF1	1173494	7405600	6.31073
J3QK89	Calcium homeostasis endoplasmic reticulum protein	CHERP	65680000	185040000	2.8173
J3QQS1	28S ribosomal protein S7, mitochondrial	MRPS7	1173494	3782100	3.22294
J3QSV6	Ribosomal L1 domain-containing protein 1	RSL1D1	1173494	3711300	3.16261
J3QT28	Mitotic checkpoint protein BUB3	BUB3	1173494	3428400	2.92153
K7EJC1	26S proteasome non-ATPase regulatory subunit 8	PSMD8	1173494	13903000	11.8475
K7EJT5	60S ribosomal protein L22	RPL22	4529000	43001000	9.49459
K7ELQ0	39S ribosomal protein L4, mitochondrial	MRPL4	15467000	59080000	3.81975
K7EMS3		KRT19	1173494	4616600	3.93406
K7ENG2	Splicing factor U2AF 65 kDa subunit	U2AF2	1173494	31662000	26.981
K7ES31	Eukaryotic translation initiation factor 3 subunit K	EIF3K	1173494	22520000	19.1906
M0R2U2	rRNA 2-O-methyltransferase fibrillarin	FBL	1173494	3967800	3.38118
M0R0F0	40S ribosomal protein S5	RPS5	35999000	218420000	6.06739
M0R0Y3	RuvB-like 2	RUVBL2	1173494	28555000	24.3333
M0R3D6	60S ribosomal protein L18a	RPL18A	1173494	207640000	176.942
M0R226	Ribosomal protein L34	MRPL34	1173494	7423100	6.32564
N0DVX5	DBF4-type zinc finger-containing protein 2	ZDBF2	1173494	15338000	13.0704
O00178	GTP-binding protein 1	GTPBP1	1173494	5708000	4.86411
O00231	26S proteasome non-ATPase regulatory subunit 11	PSMD11	1173494	17815000	15.1812
O00232	26S proteasome non-ATPase regulatory subunit 12	PSMD12	1173494	11407000	9.72054
O00268	Transcription initiation factor TFIID subunit 4	TAF4	7095300	17835000	2.51364
O00303	Eukaryotic translation initiation factor 3 subunit F	EIF3F	6901400	110340000	15.9881
O00425	Insulin-like growth factor 2 mRNA-binding protein 3	IGF2BP3	1173494	16374000	13.9532
O00487	26S proteasome non-ATPase regulatory subunit 14	PSMD14	1173494	8090700	6.89454
O14654	Insulin receptor substrate 4	IRS4	24360000	69145000	2.83846
O14744	Protein arginine N-methyltransferase 5	PRMT5	9331100000	30891000000	3.31054
O14776	Transcription elongation regulator 1	TCERG1	1173494	15713000	13.3899
O14818	Proteasome subunit alpha type-7	PSMA7	2442000	17628000	7.21867
O15042	U2 snRNP-associated SURP motif-containing protein	U2SURP	87390000	232800000	2.66392
O15226	NF-kappa-B-repressing factor	NKRF	1173494	12752000	10.8667
O15294	UDP-N-acetylglucosamine--peptide N-acetylglucosaminyltransferase 110 kDa subunit	OGT	50881000	138810000	2.72813
O15371	Eukaryotic translation initiation factor 3 subunit D	EIF3D	1173494	91016000	77.5598
O15381	Nuclear valosin-containing protein-like	NVL	1173494	3524800	3.00368
O15397	Importin-8	IPO8	172680000	357200000	2.06857
O43143	Pre-mRNA-splicing factor ATP-dependent RNA helicase DHX15	DHX15	104070000	484540000	4.6559
O43175	D-3-phosphoglycerate dehydrogenase	PHGDH	1990900	16964000	8.52077
O43242	26S proteasome non-ATPase regulatory subunit 3	PSMD3	2069500	27144000	13.1162
O43290	U4/U6.U5 tri-snRNP-associated protein 1	SART1	9178600	86278000	9.39991
O43318	Mitogen-activated protein kinase kinase kinase 7	MAP3K7	19618000	233660000	11.9105
O43390	Heterogeneous nuclear ribonucleoprotein R	HNRNPR	1173494	48945000	41.7088
O43663	Protein regulator of cytokinesis 1	PRC1	1173494	39501000	33.661
O43719	HIV Tat-specific factor 1	HTATSF1	6978700	64384000	9.22579
O60256	Phosphoribosyl pyrophosphate synthase-associated protein 2	PRPSAP2	49898000	208790000	4.18434
O60299	Leucine zipper putative tumor suppressor 3	LZTS3	1173494	3692300	3.14642
O60506	Heterogeneous nuclear ribonucleoprotein Q	SYNCRIP	14878000	94636000	6.3608
U3KQK0	Histone H2B	HIST1H2BN	30484000	109750000	3.60025
O75152	Zinc finger CCCH domain-containing protein 11A	ZC3H11A	1173494	11482000	9.78446
O75223	Gamma-glutamylcyclotransferase	GGCT	14057000	30035000	2.13666
O75394	39S ribosomal protein L33, mitochondrial	MRPL33	1173494	8085800	6.89036
O75533	Splicing factor 3B subunit 1	SF3B1	332530000	870640000	2.61823
O75643	U5 small nuclear ribonucleoprotein 200 kDa helicase	SNRNP200	23551000	561810000	23.855
O75821	Eukaryotic translation initiation factor 3 subunit G	EIF3G	1173494	61088000	52.0565
O75934	Pre-mRNA-splicing factor SPF27	BCAS2	3727300	32136000	8.62179
O94776	Metastasis-associated protein MTA2	MTA2	1173494	17961000	15.3056
O94903	Proline synthase co-transcribed bacterial homolog protein	PROSC	1173494	3210700	2.73602
O94906	Pre-mRNA-processing factor 6	PRPF6	19167000	161330000	8.41707
O94915	Protein furry homolog-like	FRYL	3925500	35478000	9.03783
O95218	Zinc finger Ran-binding domain-containing protein 2	ZRANB2	3311300	14088000	4.25452
O95347	Structural maintenance of chromosomes protein 2	SMC2	1173494	6642900	5.66079
O95400	CD2 antigen cytoplasmic tail-binding protein 2	CD2BP2	1173494	4674900	3.98374
O95831	Apoptosis-inducing factor 1, mitochondrial	AIFM1	1173494	5672000	4.83343
P00338	L-lactate dehydrogenase A chain	LDHA	1173494	47318000	40.3223
P00505	Aspartate aminotransferase, mitochondrial	GOT2	1173494	3761000	3.20496
P00747	Plasminogen	PLG	11716000	43124000	3.68078
P01040	Cystatin-A	CSTA	5975400	40265000	6.73846
P01876	Ig alpha-1 chain C region	IGHA1	1173494	2940900	2.50611
P04181	Ornithine aminotransferase, mitochondrial	OAT	14180000	67532000	4.76248
P04259	Keratin, type II cytoskeletal 6B	KRT6B	1173494	18518000	15.7802
P04843	Dolichyl-diphosphooligosaccharide--protein glycosyltransferase subunit 1	RPN1	1173494	8456800	7.20651
P05089	Arginase-1	ARG1	33406000	100060000	2.99527
P05109	Protein S100-A8	S100A8	59326000	130520000	2.20005
P05141	ADP/ATP translocase 2	SLC25A5	220700000	806610000	3.65478
P05198	Eukaryotic translation initiation factor 2 subunit 1	EIF2S1	23693000	100290000	4.2329
P05388	60S acidic ribosomal protein P0	RPLP0	135130000	525420000	3.88826
P05455	Lupus La protein	SSB	1173494	8247000	7.02773
P06576	ATP synthase subunit beta, mitochondrial	ATP5B	14143000	72714000	5.14134
P06702	Protein S100-A9	S100A9	97620000	229510000	2.35106
P06733	Alpha-enolase	ENO1	82311000	188510000	2.29022
P06748	Nucleophosmin	NPM1	153860000	340870000	2.21546
P07195	L-lactate dehydrogenase B chain	LDHB	1173494	11911000	10.15
P07814	Bifunctional glutamate/proline--tRNA ligase	EPRS	37972000	295500000	7.78205
P07900	Heat shock protein HSP 90-alpha	HSP90AA1	66882000	261590000	3.91122
P08238	Heat shock protein HSP 90-beta	HSP90AB1	37209000	122970000	3.30485
P08559	Pyruvate dehydrogenase E1 component subunit alpha, somatic form, mitochondrial	PDHA1	1173494	23710000	20.2046
P08579	U2 small nuclear ribonucleoprotein B	SNRPB2	22815000	67869000	2.97475
P08621	U1 small nuclear ribonucleoprotein 70 kDa	SNRNP70	1173494	13406000	11.424
Q5H8Y1	Tyrosine-protein kinase receptor	ROS1	1173494	6037000	5.14447
P09661	U2 small nuclear ribonucleoprotein A	SNRPA1	53577000	169560000	3.16479
P09874	Poly [ADP-ribose] polymerase 1	PARP1	204410000	673800000	3.29632
P0DN76	Splicing factor U2AF 35 kDa subunit	U2AF1	1173494	3177800	2.70798
P0DN79	Cystathionine beta-synthase	CBS	1173494	9610500	8.18965
P10599	Thioredoxin	TXN	58804000	133880000	2.27672
P10644	cAMP-dependent protein kinase type I-alpha regulatory subunit	PRKAR1A	2157600	19033000	8.82138
P10809	60 kDa heat shock protein, mitochondrial	HSPD1	15595000	88155000	5.65277
P11021	78 kDa glucose-regulated protein	HSPA5	88407000	201260000	2.27652
P11142	Heat shock cognate 71 kDa protein	HSPA8	485420000	1459800000	3.00729
P11177	Pyruvate dehydrogenase E1 component subunit beta, mitochondrial	PDHB	1846300	59510000	32.232
P11387	DNA topoisomerase 1	TOP1	1173494	6576400	5.60412
P11586	C-1-tetrahydrofolate synthase, cytoplasmic	MTHFD1	9721800	97189000	9.99702
P11908	Ribose-phosphate pyrophosphokinase 2	PRPS2	3861900	29593000	7.66281
P11940	Polyadenylate-binding protein 1	PABPC1	60487000	1767900000	29.2278
P12236	ADP/ATP translocase 3	SLC25A6	15120000	55790000	3.68981
P12956	X-ray repair cross-complementing protein 6	XRCC6	39249000	345730000	8.80863
P13010	X-ray repair cross-complementing protein 5	XRCC5	37000000	273680000	7.39676
P13639	Elongation factor 2	EEF2	28289000	165680000	5.85669
P14174	Macrophage migration inhibitory factor	MIF	1173494	9340000	7.95914
P14618	Pyruvate kinase PKM	PKM	28186000	103590000	3.67523
P14866	Heterogeneous nuclear ribonucleoprotein L	HNRNPL	77135000	564760000	7.32171
P14868	Aspartate--tRNA ligase, cytoplasmic	DARS	26356000	264580000	10.0387
P15531	Nucleoside diphosphate kinase A	NME1	5558700	31161000	5.60581
P15880	40S ribosomal protein S2	RPS2	189180000	941660000	4.97759
P16403	Histone H1.2	HIST1H1C	66272000	174040000	2.62615
P17066	Heat shock 70 kDa protein 6	HSPA6	33360000	92502000	2.77284
P17812	CTP synthase 1	CTPS1	1173494	2439500	2.07883
P17987	T-complex protein 1 subunit alpha	TCP1	27756000	141650000	5.1034
P18077	60S ribosomal protein L35a	RPL35A	1173494	40147000	34.2115
P18124	60S ribosomal protein L7	RPL7	70417000	271400000	3.85418
P19338	Nucleolin	NCL	339390000	684610000	2.01718
P19474	E3 ubiquitin-protein ligase TRIM21	TRIM21	1273900	31519000	24.7421
P20042	Eukaryotic translation initiation factor 2 subunit 2	EIF2S2	5437400	71082000	13.0728
P21333	Filamin-A	FLNA	410360000	1222300000	2.9786
P21796	Voltage-dependent anion-selective channel protein 1	VDAC1	3861900	12138000	3.14301
P22234	Multifunctional protein ADE2	PAICS	1173494	8006700	6.82296
P22314	Ubiquitin-like modifier-activating enzyme 1	UBA1	1173494	5070100	4.32052
P22626	Heterogeneous nuclear ribonucleoproteins A2/B1	HNRNPA2B1	337770000	894880000	2.64938
P22735	Protein-glutamine gamma-glutamyltransferase K	TGM1	4004100	14441000	3.60655
P23246	Splicing factor, proline- and glutamine-rich	SFPQ	265860000	726810000	2.73381
P23396	40S ribosomal protein S3	RPS3	159090000	1247200000	7.83959
P23458	Tyrosine-protein kinase JAK1	JAK1	4050400	34653000	8.55545
P23526	Adenosylhomocysteinase	AHCY	1173494	18434000	15.7086
P23528	Cofilin-1	CFL1	3116000	31049000	9.96438
P25205	DNA replication licensing factor MCM3	MCM3	1173494	5595500	4.76824
P25398	40S ribosomal protein S12	RPS12	84802000	315540000	3.7209
P25786	Proteasome subunit alpha type-1	PSMA1	1173494	7864700	6.70195
P25788	Proteasome subunit alpha type-3	PSMA3	1173494	20436000	17.4147
P26196	Probable ATP-dependent RNA helicase DDX6	DDX6	1173494	43728000	37.2631
P26358	DNA (cytosine-5)-methyltransferase 1	DNMT1	1173494	13401000	11.4197
P26640	Valine--tRNA ligase	VARS	3857800	14564000	3.77521
P26641	Elongation factor 1-gamma	EEF1G	68149000	330730000	4.85304
P27348	14-3-3 protein theta	YWHAQ	1173494	25154000	21.4351
P28066	Proteasome subunit alpha type-5	PSMA5	4540700	20071000	4.42024
P28072	Proteasome subunit beta type-6	PSMB6	1173494	17060000	14.5378
P28074	Proteasome subunit beta type-5	PSMB5	2095700	17993000	8.58568
P29692	Elongation factor 1-delta	EEF1D	20660000	112390000	5.43998
P30041	Peroxiredoxin-6	PRDX6	10072000	44997000	4.46753
P30050	60S ribosomal protein L12	RPL12	15272000	303250000	19.8566
P30153	Serine/threonine-protein phosphatase 2A 65 kDa regulatory subunit A alpha isoform	PPP2R1A	1173494	11881000	10.1245
P31025	Lipocalin-1	LCN1	1173494	6149200	5.24008
P31151	Protein S100-A7	S100A7	1173494	4902600	4.17778
P31153	S-adenosylmethionine synthase isoform type-2	MAT2A	41971000	149340000	3.55817
P31689	DnaJ homolog subfamily A member 1	DNAJA1	1173494	25105000	21.3934
P31948	Stress-induced-phosphoprotein 1	STIP1	1173494	3346400	2.85165
P32969	60S ribosomal protein L9	RPL9	32511000	444770000	13.6806
P35249	Replication factor C subunit 4	RFC4	1173494	4323000	3.68387
P35250	Replication factor C subunit 2	RFC2	1173494	2393500	2.03964
P35579	Myosin-9	MYH9	2545700	15453000	6.07024
P36542	ATP synthase subunit gamma, mitochondrial	ATP5C1	1173494	4096200	3.4906
P36578	60S ribosomal protein L4	RPL4	131750000	865480000	6.56911
P38159	RNA-binding motif protein, X chromosome	RBMX	20009000	50940000	2.54585
P38646	Stress-70 protein, mitochondrial	HSPA9	59004000	202460000	3.43129
P38919	Eukaryotic initiation factor 4A-III	EIF4A3	7200800	132330000	18.3771
P39019	40S ribosomal protein S19	RPS19	136940000	474850000	3.46758
P39023	60S ribosomal protein L3	RPL3	45528000	418160000	9.18468
P40227	T-complex protein 1 subunit zeta	CCT6A	31377000	172030000	5.48268
P40429	60S ribosomal protein L13a	RPL13A	66559000	206350000	3.10026
P41091	Eukaryotic translation initiation factor 2 subunit 3	EIF2S3	15549000	221790000	14.2639
P42285	Superkiller viralicidic activity 2-like 2	SKIV2L2	1173494	14606000	12.4466
P42677	40S ribosomal protein S27	RPS27	19465000	141190000	7.25353
P42704	Leucine-rich PPR motif-containing protein, mitochondrial	LRPPRC	1173494	64203000	54.711
P42766	60S ribosomal protein L35	RPL35	26797000	76744000	2.8639
P43686	26S protease regulatory subunit 6B	PSMC4	1173494	4413200	3.76074
P46087	Probable 28S rRNA (cytosine(4447)-C(5))-methyltransferase	NOP2	1173494	7833300	6.67519
P46109	Crk-like protein	CRKL	1173494	8264600	7.04273
P46777	60S ribosomal protein L5	RPL5	15975000	161170000	10.0889
P46778	60S ribosomal protein L21	RPL21	8525900	135050000	15.84
P46783	40S ribosomal protein S10	RPS10	61299000	335620000	5.47513
P46821	Microtubule-associated protein 1B	MAP1B	28183000	189900000	6.7381
P46940	Ras GTPase-activating-like protein IQGAP1	IQGAP1	78822000	253290000	3.21344
P47897	Glutamine--tRNA ligase	QARS	20647000	72779000	3.52492
P47914	60S ribosomal protein L29	RPL29	23664000	64651000	2.73204
P48634	Protein PRRC2A	PRRC2A	1173494	35972000	30.6538
P49207	60S ribosomal protein L34	RPL34	21208000	90394000	4.26226
P49368	T-complex protein 1 subunit gamma	CCT3	29748000	277640000	9.33306
P49406	39S ribosomal protein L19, mitochondrial	MRPL19	8967200	85780000	9.56597
P49674	Casein kinase I isoform epsilon	CSNK1E	1173494	10775000	9.18198
P49721	Proteasome subunit beta type-2	PSMB2	1173494	3787500	3.22754
Q5JUV6	Cytosolic purine 5-nucleotidase	NT5C2	1173494	5793100	4.93663
P50402	Emerin	EMD	1173494	3512800	2.99345
P50750	Cyclin-dependent kinase 9	CDK9	1173494	16644000	14.1833
P50990	T-complex protein 1 subunit theta	CCT8	72299000	255710000	3.53684
P51659	Peroxisomal multifunctional enzyme type 2	HSD17B4	1472300	5601500	3.80459
P51665	26S proteasome non-ATPase regulatory subunit 7	PSMD7	1173494	8204700	6.99168
P51991	Heterogeneous nuclear ribonucleoprotein A3	HNRNPA3	16302000	113110000	6.93841
P52292	Importin subunit alpha-1	KPNA2	2964600	44164000	14.8971
P52597	Heterogeneous nuclear ribonucleoprotein F	HNRNPF	1173494	15098000	12.8659
P52756	RNA-binding protein 5	RBM5	4511700	34099000	7.55791
P52815	39S ribosomal protein L12, mitochondrial	MRPL12	14767000	36487000	2.47085
P53999	Activated RNA polymerase II transcriptional coactivator p15	SUB1	1173494	16371000	13.9506
P54136	Arginine--tRNA ligase, cytoplasmic	RARS	1173494	75275000	64.146
Q5VWC4	26S proteasome non-ATPase regulatory subunit 4	PSMD4	1173494	5562400	4.74003
P55072	Transitional endoplasmic reticulum ATPase	VCP	7951000	53286000	6.7018
P55884	Eukaryotic translation initiation factor 3 subunit B	EIF3B	2625600	270050000	102.853
P56182	Ribosomal RNA processing protein 1 homolog A	RRP1	1173494	3495600	2.9788
P56192	Methionine--tRNA ligase, cytoplasmic	MARS	6461100	77486000	11.9927
P56537	Eukaryotic translation initiation factor 6	EIF6	5472000	13242000	2.41996
P60174	Triosephosphate isomerase	TPI1	27716000	72800000	2.62664
P60228	Eukaryotic translation initiation factor 3 subunit E	EIF3E	2474300	117330000	47.4195
P60842	Eukaryotic initiation factor 4A-I	EIF4A1	12975000	60020000	4.62582
P60866	40S ribosomal protein S20	RPS20	20796000	252100000	12.1225
P60891	Ribose-phosphate pyrophosphokinase 1	PRPS1	206860000	796540000	3.85062
P60953	Cell division control protein 42 homolog	CDC42	1173494	8928600	7.60856
R4GMT0	Alpha-centractin	ACTR1A	1173494	19882000	16.9426
P61247	40S ribosomal protein S3a	RPS3A	259890000	948390000	3.6492
P61254	60S ribosomal protein L26	RPL26	19304000	190270000	9.85651
P61313	60S ribosomal protein L15	RPL15	13294000	85816000	6.45524
P61353	60S ribosomal protein L27	RPL27	8806600	78148000	8.8738
P61513	60S ribosomal protein L37a	RPL37A	2207000	10531000	4.77164
P61964	WD repeat-containing protein 5	WDR5	1173494	5279500	4.49896
P61978	Heterogeneous nuclear ribonucleoprotein K	HNRNPK	872580000	2435400000	2.79103
P62081	40S ribosomal protein S7	RPS7	65959000	253650000	3.84557
P62241	40S ribosomal protein S8	RPS8	271040000	783260000	2.88983
P62244	40S ribosomal protein S15a	RPS15A	33616000	210090000	6.2497
P62249	40S ribosomal protein S16	RPS16	76638000	411540000	5.36992
P62258	14-3-3 protein epsilon	YWHAE	3988000	26690000	6.69258
P62263	40S ribosomal protein S14	RPS14	79969000	275870000	3.44971
P62266	40S ribosomal protein S23	RPS23	52507000	253110000	4.8205
P62273	40S ribosomal protein S29	RPS29	8607700	42816000	4.97415
P62277	40S ribosomal protein S13	RPS13	52219000	402720000	7.71214
P62280	40S ribosomal protein S11	RPS11	27554000	226370000	8.2155
P62304	Small nuclear ribonucleoprotein E	SNRPE	4922700	47464000	9.64186
P62306	Small nuclear ribonucleoprotein F	SNRPF	4099200	16923000	4.12837
P62314	Small nuclear ribonucleoprotein Sm D1	SNRPD1	20227000	464960000	22.9871
P62316	Small nuclear ribonucleoprotein Sm D2	SNRPD2	105690000	313630000	2.96745
P62318	Small nuclear ribonucleoprotein Sm D3	SNRPD3	108640000	666450000	6.13448
P62424	60S ribosomal protein L7a	RPL7A	86740000	401520000	4.62901
P62701	40S ribosomal protein S4, X isoform	RPS4X	201670000	808780000	4.01041
P62753	40S ribosomal protein S6	RPS6	162930000	639360000	3.92414
P62805	Histone H4	HIST1H4A	202640000	461810000	2.27897
P62829	60S ribosomal protein L23	RPL23	1173494	145440000	123.938
P62851	40S ribosomal protein S25	RPS25	51052000	291900000	5.7177
Q5JNZ5	Putative 40S ribosomal protein S26-like 1	RPS26P11	16825000	151530000	9.00624
P62857	40S ribosomal protein S28	RPS28	1173494	13016000	11.0917
P62888	60S ribosomal protein L30	RPL30	9317200	177890000	19.0926
P62899	60S ribosomal protein L31	RPL31	53577000	198630000	3.70737
P62906	60S ribosomal protein L10a	RPL10A	60710000	404720000	6.66645
P62913	60S ribosomal protein L11	RPL11	25895000	91608000	3.53767
P62917	60S ribosomal protein L8	RPL8	55278000	248950000	4.5036
P62995	Transformer-2 protein homolog beta	TRA2B	1173494	4708800	4.01263
P63104	14-3-3 protein zeta/delta	YWHAZ	1173494	32770000	27.9252
P63244	Guanine nucleotide-binding protein subunit beta-2-like 1	GNB2L1	1173494	56978000	48.5541
P67809	Nuclease-sensitive element-binding protein 1	YBX1	19950000	136650000	6.84962
P68104	Elongation factor 1-alpha 1	EEF1A1	721710000	2319500000	3.21389
P68363	Tubulin alpha-1B chain	TUBA1B	10693000	167540000	15.6682
P68371	Tubulin beta-4B chain	TUBB4B	56381000	141000000	2.50084
P78332	RNA-binding protein 6	RBM6	1173494	9952100	8.48074
P78347	General transcription factor II-I	GTF2I	1173494	7448000	6.34686
P78371	T-complex protein 1 subunit beta	CCT2	95894000	193860000	2.02161
P78527	DNA-dependent protein kinase catalytic subunit	PRKDC	1173494	11830000	10.081
P84090	Enhancer of rudimentary homolog	ERH	164350000	423700000	2.57803
Q00839	Heterogeneous nuclear ribonucleoprotein U	HNRNPU	249430000	826520000	3.31364
Q01082	Spectrin beta chain, non-erythrocytic 1	SPTBN1	465280000	1312100000	2.82002
Q01780	Exosome component 10	EXOSC10	1173494	13256000	11.2962
Q01804	OTU domain-containing protein 4	OTUD4	528090000	1287800000	2.4386
Q02878	60S ribosomal protein L6	RPL6	62157000	238370000	3.83497
Q03393	6-pyruvoyl tetrahydrobiopterin synthase	PTS	2853600	18813000	6.59272
Q06787	Fragile X mental retardation protein 1	FMR1	1173494	4158100	3.54335
Q07065	Cytoskeleton-associated protein 4	CKAP4	10432000	66651000	6.38909
Q07666	KH domain-containing, RNA-binding, signal transduction-associated protein 1	KHDRBS1	47299000	189220000	4.00051
Q08170	Serine/arginine-rich splicing factor 4	SRSF4	1173494	2495300	2.12638
Q08211	ATP-dependent RNA helicase A	DHX9	67410000	245670000	3.64441
Q08378	Golgin subfamily A member 3	GOLGA3	6885000	22689000	3.29542
Q08554	Desmocollin-1	DSC1	84888000	238950000	2.81489
Q09028	Histone-binding protein RBBP4	RBBP4	22091000	51262000	2.32049
Q09161	Nuclear cap-binding protein subunit 1	NCBP1	1173494	14239000	12.1338
Q12873	Chromodomain-helicase-DNA-binding protein 3	CHD3	1173494	8853900	7.5449
Q12874	Splicing factor 3A subunit 3	SF3A3	59279000	273160000	4.60804
Q12906	Interleukin enhancer-binding factor 3	ILF3	78237000	276750000	3.53733
Q12986	Transcriptional repressor NF-X1	NFX1	1173494	1931000000	1645.51
Q12996	Cleavage stimulation factor subunit 3	CSTF3	1173494	3312400	2.82268
Q13045	Protein flightless-1 homolog	FLII	1173494	8517300	7.25807
Q13123	Protein Red	IK	1173494	17932000	15.2809
Q13151	Heterogeneous nuclear ribonucleoprotein A0	HNRNPA0	11942000	64516000	5.40245
Q13155	Aminoacyl tRNA synthase complex-interacting multifunctional protein 2	AIMP2	1173494	24213000	20.6333
Q13200	26S proteasome non-ATPase regulatory subunit 2	PSMD2	5066500	24309000	4.79799
Q13247	Serine/arginine-rich splicing factor 6	SRSF6	6088000	33632000	5.52431
Q13263	Transcription intermediary factor 1-beta	TRIM28	33898000	153420000	4.52593
Q13283	Ras GTPase-activating protein-binding protein 1	G3BP1	2524700	71020000	28.1301
Q13347	Eukaryotic translation initiation factor 3 subunit I	EIF3I	1173494	76252000	64.9786
Q13409	Cytoplasmic dynein 1 intermediate chain 2	DYNC1I2	1173494	3000500	2.55689
Q13435	Splicing factor 3B subunit 2	SF3B2	233890000	689730000	2.94895
Q13464	Rho-associated protein kinase 1	ROCK1	49772000	221940000	4.45913
Q13547	Histone deacetylase 1	HDAC1	4451400	40884000	9.18453
Q13561	Dynactin subunit 2	DCTN2	5966600	40639000	6.81108
Q13813	Spectrin alpha chain, non-erythrocytic 1	SPTAN1	525370000	1323500000	2.51918
Q13868	Exosome complex component RRP4	EXOSC2	1173494	17548000	14.9536
Q13895	Bystin	BYSL	8818100	26766000	3.03535
Q14008	Cytoskeleton-associated protein 5	CKAP5	65226000	531440000	8.14767
Q14011	Cold-inducible RNA-binding protein	CIRBP	1173494	5749400	4.89939
Q14103	Heterogeneous nuclear ribonucleoprotein D0	HNRNPD	50541000	241590000	4.78008
Q14152	Eukaryotic translation initiation factor 3 subunit A	EIF3A	38053000	318290000	8.36439
Q14204	Cytoplasmic dynein 1 heavy chain 1	DYNC1H1	1173494	17604000	15.0014
Q14247	Src substrate cortactin	CTTN	1173494	15010000	12.7909
Q14558	Phosphoribosyl pyrophosphate synthase-associated protein 1	PRPSAP1	1173494	16177000	13.7853
Q14681	BTB/POZ domain-containing protein KCTD2	KCTD2	6649300	16815000	2.52884
Q14683	Structural maintenance of chromosomes protein 1A	SMC1A	4617200	22417000	4.85511
Q14684	Ribosomal RNA processing protein 1 homolog B	RRP1B	1173494	2578800	2.19754
Q14692	Ribosome biogenesis protein BMS1 homolog	BMS1	1173494	14735000	12.5565
Q15008	26S proteasome non-ATPase regulatory subunit 6	PSMD6	1770200	9006100	5.08762
Q15024	Exosome complex component RRP42	EXOSC7	1173494	6632100	5.65158
Q15029	116 kDa U5 small nuclear ribonucleoprotein component	EFTUD2	31405000	259790000	8.27225
Q15046	Lysine--tRNA ligase	KARS	1173494	56463000	48.1153
Q15233	Non-POU domain-containing octamer-binding protein	NONO	257900000	686440000	2.66165
Q15365	Poly(rC)-binding protein 1	PCBP1	1173494	43448000	37.0245
Q15393	Splicing factor 3B subunit 3	SF3B3	365020000	975780000	2.67322
Q15428	Splicing factor 3A subunit 2	SF3A2	5130100	107440000	20.9431
Q15459	Splicing factor 3A subunit 1	SF3A1	114240000	334300000	2.9263
Q15637	Splicing factor 1	SF1	1173494	12389000	10.5574
Q15650	Activating signal cointegrator 1	TRIP4	1173494	10553000	8.9928
Q15717	ELAV-like protein 1	ELAVL1	4308300	78060000	18.1185
Q15750	TGF-beta-activated kinase 1 and MAP3K7-binding protein 1	TAB1	117020000	496490000	4.24278
Q16531	DNA damage-binding protein 1	DDB1	4925000	28374000	5.76122
Q16610	Extracellular matrix protein 1	ECM1	4844900	10876000	2.24483
Q16659	Mitogen-activated protein kinase 6	MAPK6	1173494	5072800	4.32282
Q2NL82	Pre-rRNA-processing protein TSR1 homolog	TSR1	1173494	13842000	11.7955
Q2TAY7	WD40 repeat-containing protein SMU1	SMU1	8671500	44248000	5.10269
Q32MZ4	Leucine-rich repeat flightless-interacting protein 1	LRRFIP1	7349500	17635000	2.39948
Q3V6T2	Girdin	CCDC88A	1173494	21578000	18.3878
Q4G0J3	La-related protein 7	LARP7	1173494	4989000	4.25141
Q5FWF5	N-acetyltransferase ESCO1	ESCO1	1173494	15663000	13.3473
Q5JR04	Putative helicase MOV-10	MOV10	1173494	35585000	30.324
Q5JR91	Kinesin-like protein	KIF2C	1173494	7687600	6.55103
Q5JTH9	RRP12-like protein	RRP12	1627900	8458600	5.19602
Q5QPA5	28S ribosomal protein S18a, mitochondrial	MRPS18A	1173494	25303000	21.5621
Q5RKV6	Exosome complex component MTR3	EXOSC6	3497000	12419000	3.55133
Q5SWX8	Protein odr-4 homolog	ODR4	2719300	46862000	17.2331
Q5T653	39S ribosomal protein L2, mitochondrial	MRPL2	1173494	17305000	14.7466
Q5T749	Keratinocyte proline-rich protein	KPRP	29090000	119430000	4.10553
Q5T750	Skin-specific protein 32	XP32	20541000	51909000	2.52709
Q5T9A4	ATPase family AAA domain-containing protein 3B	ATAD3B	5677400	55633000	9.79903
Q5THR1	Probable ATP-dependent RNA helicase DHX35	DHX35	1173494	4399900	3.7494
Q5W0B1	RING finger protein 219	RNF219	55753000	275640000	4.94395
Q66K74	Microtubule-associated protein 1S	MAP1S	1173494	3751000	3.19644
Q69YN4	Protein virilizer homolog	KIAA1429	1173494	3114800	2.6543
Q6P158	Putative ATP-dependent RNA helicase DHX57	DHX57	1173494	8536800	7.27469
Q6P1L8	39S ribosomal protein L14, mitochondrial	MRPL14	1173494	20024000	17.0636
Q6P2Q9	Pre-mRNA-processing-splicing factor 8	PRPF8	53829000	376950000	7.00273
Q6PKG0	La-related protein 1	LARP1	7690800	188500000	24.5098
Q6UXV0	GDNF family receptor alpha-like	GFRAL	1173494	7004600	5.96901
X6RLN4	La-related protein 4	LARP4	1173494	34316000	29.2426
Q7KZF4	Staphylococcal nuclease domain-containing protein 1	SND1	6796500	47646000	7.01037
Q7RTV0	PHD finger-like domain-containing protein 5A	PHF5A	1173494	13494000	11.499
Q7Z2W4	Zinc finger CCCH-type antiviral protein 1	ZC3HAV1	1173494	2352100	2.00436
Q7Z2W9	39S ribosomal protein L21, mitochondrial	MRPL21	1173494	61030000	52.0071
Q7Z353	Highly divergent homeobox	HDX	10239000	28785000	2.81131
X6R631	39S ribosomal protein L55, mitochondrial	MRPL55	1173494	6031800	5.14003
Q86UE4	Protein LYRIC	MTDH	10116000	45702000	4.51779
Q86UP2	Kinectin	KTN1	1173494	6018400	5.12862
Q86YM7	Homer protein homolog 1	HOMER1	2883100	9116800	3.16215
Q8IUF8	Bifunctional lysine-specific demethylase and histidyl-hydroxylase MINA	MINA	1173494	10345000	8.81555
Q8IWI9	MAX gene-associated protein	MGA	3321700	29914000	9.00563
Q8IX12	Cell division cycle and apoptosis regulator protein 1	CCAR1	9680400	52829000	5.45732
Q8IXM3	39S ribosomal protein L41, mitochondrial	MRPL41	1173494	9104400	7.75837
Q8IY81	pre-rRNA processing protein FTSJ3	FTSJ3	1173494	5682100	4.84204
Q8N3C0	Activating signal cointegrator 1 complex subunit 3	ASCC3	1173494	62257000	53.0527
Q8N5Z5	BTB/POZ domain-containing protein KCTD17	KCTD17	1173494	55588000	47.3696
Q8N680	Zinc finger and BTB domain-containing protein 2	ZBTB2	1173494	4415900	3.76304
Q8N684	Cleavage and polyadenylation specificity factor subunit 7	CPSF7	1426800	3229900	2.26374
Q8NCE2	Myotubularin-related protein 14	MTMR14	3300700	27372000	8.29279
Q8ND56	Protein LSM14 homolog A	LSM14A	22289000	60571000	2.71753
Q8NE71	ATP-binding cassette sub-family F member 1	ABCF1	1684200	45113000	26.786
Q8NG84	Olfactory receptor 2AK2	OR2AK2	1173494	45387000	38.6768
Q8NHQ1	Centrosomal protein of 70 kDa	CEP70	1173494	15280000	13.0209
Q9Y5Q3	Transcription factor MafB	MAFB	1173494	158810000	135.331
Q8TDY2	RB1-inducible coiled-coil protein 1	RB1CC1	2247200	32791000	14.5919
Q8TEQ6	Gem-associated protein 5	GEMIN5	1173494	7935300	6.76211
Q8WU90	Zinc finger CCCH domain-containing protein 15	ZC3H15	979710	39292000	40.1057
Q8WUA2	Peptidyl-prolyl cis-trans isomerase-like 4	PPIL4	1173494	10764000	9.17261
Q8WWY3	U4/U6 small nuclear ribonucleoprotein Prp31	PRPF31	255950000	519650000	2.03028
Q8WXF1	Paraspeckle component 1	PSPC1	24304000	213360000	8.7788
Q92522	Histone H1x	H1FX	3904400	24968000	6.39484
Q92598	Heat shock protein 105 kDa	HSPH1	4247800	31383000	7.38806
Q92615	La-related protein 4B	LARP4B	1173494	29244000	24.9205
Q92616	Translational activator GCN1	GCN1L1	8277500	17882000	2.16031
Q92620	Pre-mRNA-splicing factor ATP-dependent RNA helicase PRP16	DHX38	2763000	16431000	5.9468
Q92665	28S ribosomal protein S31, mitochondrial	MRPS31	1173494	2393100	2.03929
Q92769	Histone deacetylase 2	HDAC2	1173494	9648800	8.22228
Q92900	Regulator of nonsense transcripts 1	UPF1	1173494	55194000	47.0339
Q92922	SWI/SNF complex subunit SMARCC1	SMARCC1	1173494	6787300	5.78384
Q92979	Ribosomal RNA small subunit methyltransferase NEP1	EMG1	1173494	6727700	5.73305
Q93008	Probable ubiquitin carboxyl-terminal hydrolase FAF-X	USP9X	1173494	83855000	71.4575
Q96A35	39S ribosomal protein L24, mitochondrial	MRPL24	9927600	70883000	7.13999
Q96AG4	Leucine-rich repeat-containing protein 59	LRRC59	62674000	222080000	3.54342
Q96AV8	Transcription factor E2F7	E2F7	27517000	62987000	2.28902
Q96B26	Exosome complex component RRP43	EXOSC8	1173494	5475400	4.6659
Q96DG6	Carboxymethylenebutenolidase homolog	CMBL	3431600	10770000	3.13848
Q96DI7	U5 small nuclear ribonucleoprotein 40 kDa protein	SNRNP40	1173494	41749000	35.5767
Q96DV4	39S ribosomal protein L38, mitochondrial	MRPL38	21629000	77254000	3.57178
Q96GA3	Protein LTV1 homolog	LTV1	1173494	10310000	8.78573
Q96HS1	Serine/threonine-protein phosphatase PGAM5, mitochondrial	PGAM5	2877200	42618000	14.8123
Q96I25	Splicing factor 45	RBM17	15062000	147480000	9.79153
Q96P63	Serpin B12	SERPINB12	9177700	64929000	7.07465
Q96PK6	RNA-binding protein 14	RBM14	1173494	39174000	33.3824
Q96PU8	Protein quaking	QKI	1173494	28163000	23.9993
Q96S59	Ran-binding protein 9	RANBP9	1173494	5489200	4.67765
Q99459	Cell division cycle 5-like protein	CDC5L	26459000	161390000	6.09963
Q99575	Ribonucleases P/MRP protein subunit POP1	POP1	1173494	6539400	5.57259
Q99613	Eukaryotic translation initiation factor 3 subunit C	EIF3C	19175000	199760000	10.4177
Q99832	T-complex protein 1 subunit eta	CCT7	27632000	69109000	2.50105
Q9BQA1	Methylosome protein 50	WDR77	4286800000	12127000000	2.82892
Q9BQC6	Ribosomal protein 63, mitochondrial	MRPL57	6311300	33586000	5.32157
Q9BQG0	Myb-binding protein 1A	MYBBP1A	10510000	44246000	4.2099
Q9BRS2	Serine/threonine-protein kinase RIO1	RIOK1	941850000	2670500000	2.83538
Q9BU76	Multiple myeloma tumor-associated protein 2	MMTAG2	4358800	21684000	4.97476
Q9BUQ8	Probable ATP-dependent RNA helicase DDX23	DDX23	9099500	29175000	3.20622
Q9BUW7	UPF0184 protein C9orf16	C9orf16	1173494	4889100	4.16628
Q9BVP2	Guanine nucleotide-binding protein-like 3	GNL3	1173494	37250000	31.7428
Q9BWJ5	Splicing factor 3B subunit 5	SF3B5	1173494	7392100	6.29922
Q9BXP5	Serrate RNA effector molecule homolog	SRRT	1967400	19040000	9.67775
Q9BYC9	39S ribosomal protein L20, mitochondrial	MRPL20	1173494	9919800	8.45322
Q9BYD1	39S ribosomal protein L13, mitochondrial	MRPL13	1173494	82947000	70.6838
Q9BYD6	39S ribosomal protein L1, mitochondrial	MRPL1	11477000	68996000	6.01168
Q9BZE1	39S ribosomal protein L37, mitochondrial	MRPL37	34806000	151630000	4.35643
Q9BZE4	Nucleolar GTP-binding protein 1	GTPBP4	1173494	13858000	11.8092
Q9H0A0	N-acetyltransferase 10	NAT10	1173494	9409300	8.01819
Q9H0D6	5-3 exoribonuclease 2	XRN2	1173494	8165300	6.95811
Q9H0U6	39S ribosomal protein L18, mitochondrial	MRPL18	3835500	44044000	11.4832
Q9H1I8	Activating signal cointegrator 1 complex subunit 2	ASCC2	1173494	34600000	29.4846
Q9H2U1	ATP-dependent RNA helicase DHX36	DHX36	1173494	7725400	6.58325
Q9H2W6	39S ribosomal protein L46, mitochondrial	MRPL46	3743500	74156000	19.8093
Q9H307	Pinin	PNN	6847100	26712000	3.90121
Q9H3K6	BolA-like protein 2	BOLA2	44685000	91379000	2.04496
Q9H6S0	Probable ATP-dependent RNA helicase YTHDC2	YTHDC2	1173494	3688200	3.14292
Q9H7D7	WD repeat-containing protein 26	WDR26	1173494	14309000	12.1935
Q9H9J2	39S ribosomal protein L44, mitochondrial	MRPL44	11019000	85136000	7.72629
Q9HC36	rRNA methyltransferase 3, mitochondrial	RNMTL1	1173494	11334000	9.65834
Q9HD33	39S ribosomal protein L47, mitochondrial	MRPL47	7281500	53339000	7.32528
Q9NP73	Putative bifunctional UDP-N-acetylglucosamine transferase and deubiquitinase ALG13	ALG13	8857000	88087000	9.94547
Q9NP92	28S ribosomal protein S30, mitochondrial	MRPS30	1173494	81613000	69.547
Q9NPD3	Exosome complex component RRP41	EXOSC4	1173494	5325300	4.53799
Q9NQ50	39S ribosomal protein L40, mitochondrial	MRPL40	2785500	14348000	5.15096
Q9NQT5	Exosome complex component RRP40	EXOSC3	1173494	7779300	6.62918
Q9NRX1	RNA-binding protein PNO1	PNO1	1173494	25588000	21.805
Q9NSI2	Protein FAM207A	FAM207A	3178600	6473000	2.03643
Q9NUL7	Probable ATP-dependent RNA helicase DDX28	DDX28	1173494	2557500	2.17939
Q9NVN8	Guanine nucleotide-binding protein-like 3-like protein	GNL3L	1173494	5466900	4.65865
Q9NX20	39S ribosomal protein L16, mitochondrial	MRPL16	1173494	40062000	34.1391
Q9NX58	Cell growth-regulating nucleolar protein	LYAR	1173494	31316000	26.6861
Q9NXV2	BTB/POZ domain-containing protein KCTD5	KCTD5	77789000	323820000	4.1628
Q9NY12	H/ACA ribonucleoprotein complex subunit 1	GAR1	8394000	63821000	7.60317
Q9NYF8	Bcl-2-associated transcription factor 1	BCLAF1	216630000	688860000	3.17989
Q9NYK5	39S ribosomal protein L39, mitochondrial	MRPL39	24457000	88177000	3.60539
Q9NZB2	Constitutive coactivator of PPAR-gamma-like protein 1	FAM120A	1981200	11784000	5.94791
Q9NZI8	Insulin-like growth factor 2 mRNA-binding protein 1	IGF2BP1	28883000	436700000	15.1196
Q9P015	39S ribosomal protein L15, mitochondrial	MRPL15	29210000	105020000	3.59534
Q9P219	Protein Daple	CCDC88C	4504900	84996000	18.8675
Q9P2I0	Cleavage and polyadenylation specificity factor subunit 2	CPSF2	1173494	5809600	4.95069
Q9P2J5	Leucine--tRNA ligase, cytoplasmic	LARS	28369000	106280000	3.74634
Q9P2R3	Rabankyrin-5	ANKFY1	39848000	136780000	3.43254
Q9UBN7	Histone deacetylase 6	HDAC6	7269600	45224000	6.22098
Q9UH99	SUN domain-containing protein 2	SUN2	1173494	6779000	5.77677
Q9UHI6	Probable ATP-dependent RNA helicase DDX20	DDX20	1173494	7146100	6.08959
Q9UK59	Lariat debranching enzyme	DBR1	1173494	2354800	2.00666
Q9UKA4	A-kinase anchor protein 11	AKAP11	574070	1678400	2.92369
Q9ULV4	Coronin-1C	CORO1C	2997200	33464000	11.1651
Q9ULX3	RNA-binding protein NOB1	NOB1	1173494	10651000	9.07631
Q9UMS4	Pre-mRNA-processing factor 19	PRPF19	135110000	275390000	2.03827
Q9UNQ2	Probable dimethyladenosine transferase	DIMT1	1173494	15602000	13.2953
Q9UQ35	Serine/arginine repetitive matrix protein 2	SRRM2	1173494	14788000	12.6017
Q9UQ80	Proliferation-associated protein 2G4	PA2G4	13431000	82735000	6.16
Q9UQE7	Structural maintenance of chromosomes protein 3	SMC3	8521400	17194000	2.01774
Q9Y265	RuvB-like 1	RUVBL1	2269300	18099000	7.97559
Q9Y295	Developmentally-regulated GTP-binding protein 1	DRG1	1173494	30529000	26.0155
Q9Y2H1	Serine/threonine-protein kinase 38-like	STK38L	66301000	255700000	3.85665
Q9Y2I8	WD repeat-containing protein 37	WDR37	6762200	60907000	9.00698
Q9Y2K3	Myosin-15	MYH15	1173494	6849800	5.8371
Q9Y2W1	Thyroid hormone receptor-associated protein 3	THRAP3	420890000	1323100000	3.14358
Q9Y3B4	Splicing factor 3B subunit 6	SF3B6	1173494	102200000	87.0903
Q9Y3B7	39S ribosomal protein L11, mitochondrial	MRPL11	1173494	42560000	36.2678
Q9Y3F4	Serine-threonine kinase receptor-associated protein	STRAP	1173494	18984000	16.1773
Q9Y3U8	60S ribosomal protein L36	RPL36	3843800	76390000	19.8736
Q9Y4E8	Ubiquitin carboxyl-terminal hydrolase 15	USP15	1173494	22554000	19.2195
Q9Y5A9	YTH domain-containing family protein 2	YTHDF2	1173494	3670400	3.12775
Q9Y5B9	FACT complex subunit SPT16	SUPT16H	1173494	9855100	8.39808
Q9Y657	Spindlin-1	SPIN1	86733000	267570000	3.08498
Q9Y6A5	Transforming acidic coiled-coil-containing protein 3	TACC3	1173494	8148700	6.94396
Q9Y6Y0	Influenza virus NS1A-binding protein	IVNS1ABP	74788000	1418800000	18.971

## Sheet: replicate2 FC>2 proteins
Protein IDs	Protein names	Gene names	Intensity EV	Intensity NFX1_2	FC(NFX12/Con)
A0A024R4E5	Vigilin	HDLBP	13755000	55512000	4.03577
A0A024R4M0	40S ribosomal protein S9	RPS9	102900000	581710000	5.65316
A0A024RA52	Proteasome subunit alpha type	PSMA2	1173494	4422000	3.76823
F5GXT8	Diablo homolog, mitochondrial	DIABLO	1173494	9229100	7.86463
A0A0C4DH90	Ig kappa chain V-III region POM	IGKV3OR2-268	1173494	15729000	13.4036
H0YN88	40S ribosomal protein S17	RPS17	18658000	109770000	5.88327
A0A075B729	Ribosome biogenesis protein BOP1	BOP1	1173494	4865900	4.14651
A0A087WTP3	Far upstream element-binding protein 2	KHSRP	5320800	20564000	3.86483
A0A087WUK2	Heterogeneous nuclear ribonucleoprotein D-like	HNRNPDL	1173494	16926000	14.4236
E7ETK0	40S ribosomal protein S24	RPS24	25545000	100330000	3.92758
A0A087WUT6	Eukaryotic translation initiation factor 5B	EIF5B	2368000	24704000	10.4324
A0A087WYF5	Salivary acidic proline-rich phosphoprotein 1/2	PRH1	1173494	4705300	4.00965
A0A087WVM4	Monofunctional C1-tetrahydrofolate synthase, mitochondrial	MTHFD1L	1533800	21786000	14.2039
A0A087WW66	26S proteasome non-ATPase regulatory subunit 1	PSMD1	1173494	8087000	6.89139
A0A087WX59	Proteasomal ubiquitin receptor ADRM1	ADRM1	1173494	4596400	3.91685
A0A087WXM6	60S ribosomal protein L17	RPL17	15323000	382710000	24.9762
A0A087WYC1	Heat shock 70 kDa protein 4	HSPA4	1173494	29712000	25.3193
A0A087WYN9	ATP-dependent RNA helicase DHX29	DHX29	1418800	14897000	10.4997
A0A087WZK9	Eukaryotic translation initiation factor 3 subunit H	EIF3H	1173494	12997000	11.0755
A0A087X0X3	Heterogeneous nuclear ribonucleoprotein M	HNRNPM	52051000	292590000	5.62122
A0A087X1A5	Double-stranded RNA-binding protein Staufen homolog 1	STAU1	4830700	51718000	10.7061
A0A087X1B2	U4/U6.U5 tri-snRNP-associated protein 2	USP39	1173494	12059000	10.2761
A0A087X2B2	Baculoviral IAP repeat-containing protein 2	BIRC2	1173494	7090300	6.04204
F1T0B3	ATP-dependent RNA helicase DDX1	DDX1	25303000	73964000	2.92313
A0A087X2I1	26S protease regulatory subunit 10B	PSMC6	1173494	6364800	5.4238
F8WEI0	Pyrroline-5-carboxylate reductase	PYCRL	1173494	2778300	2.36755
A0A0A0MRA5	Heterogeneous nuclear ribonucleoprotein U-like protein 1	HNRNPUL1	1173494	4825200	4.11182
F6S8N6	Protein-L-isoaspartate O-methyltransferase	PCMT1	1173494	4908800	4.18306
A0A0A0MRK1	G patch domain-containing protein 4	GPATCH4	1173494	6024300	5.13364
A0A0A0MRV0	Ribosome-binding protein 1	RRBP1	1173494	2646200	2.25498
A0A0A0MT59	Mortality factor 4-like protein 2	MORF4L2	1173494	3281000	2.79592
H7C446	Suppressor of SWI4 1 homolog	PPAN	1173494	6888900	5.87042
F8VV32	Lysozyme	LYZ	46506000	196730000	4.23021
K7EM56	40S ribosomal protein S15	RPS15	1173494	188420000	160.563
A0A0D9SEM9		DDX39A	1173494	5234300	4.46044
A0A0D9SEU5	Ran-binding protein 10	RANBP10	1374400	3558400	2.58906
A0A0D9SFB3	ATP-dependent RNA helicase DDX3X	DDX3X	53539000	127220000	2.37621
A0A0G2JIW1	Heat shock 70 kDa protein 1B	HSPA1B	306050000	1690200000	5.52263
A0A0G2JQE3	Solute carrier family 12 member 7	SLC12A7	1173494	39248000	33.4454
A0A0J9YW13	RNA-binding protein 8A	RBM8A	1173494	3429300	2.9223
A0A0U1RR30	Transcriptional repressor p66-beta	GATAD2B	1457700	6030000	4.13665
A0A0U1RR32	Histone H2A type 1-J	HIST1H2AJ	78087000	158960000	2.03568
A0A140T9Q6	Zinc finger protein RFP	TRIM27	1173494	3407500	2.90372
A0A1X7SBZ2	Probable ATP-dependent RNA helicase DDX17	DDX17	31518000	137990000	4.37813
A0A1W2PQS1	26S protease regulatory subunit 7	PSMC2	1173494	4294000	3.65916
A0A1W2PRV5	Survival motor neuron protein	SMN1	1173494	6091600	5.19099
A2A2V2	RNA-binding protein 34	RBM34	1173494	16770000	14.2907
A6NJD9	39S ribosomal protein L23, mitochondrial	MRPL23	20629000	57958000	2.80954
A8K2U0	Alpha-2-macroglobulin-like protein 1	A2ML1	1173494	11111000	9.46831
H7BY10	60S ribosomal protein L23a	RPL23A	44807000	483480000	10.7903
Q49AN9	Small nuclear ribonucleoprotein G	SNRPG	1173494	26826000	22.8599
B0QY89	Eukaryotic translation initiation factor 3 subunit L	EIF3L	3556700	12410000	3.48919
B0YIW6	Coatomer subunit delta	ARCN1	1173494	3540400	3.01697
B1AHD1	NHP2-like protein 1	NHP2L1	1173494	4202800	3.58144
B1AK87	F-actin-capping protein subunit beta	CAPZB	1173494	9607400	8.187
B1AMU7	Exosome complex component CSL4	EXOSC1	1173494	4741600	4.04058
B1ANR0	Polyadenylate-binding protein	PABPC4	1173494	19511000	16.6264
B3KXD6	Pescadillo homolog	PES1	1173494	2715500	2.31403
B4DY09	Interleukin enhancer-binding factor 2	ILF2	28554000	125780000	4.40499
B7Z5J4	Carboxypeptidase A4	CPA4	1173494	3780000	3.22115
F8W1R7	Myosin light polypeptide 6	MYL6	1173494	27731000	23.6311
H0YHC3	Nucleosome assembly protein 1-like 1	NAP1L1	1173494	54731000	46.6394
E7ENZ3	T-complex protein 1 subunit epsilon	CCT5	15160000	37153000	2.45073
B8ZZV5	39S ribosomal protein L30, mitochondrial	MRPL30	1173494	4222500	3.59823
H0YAL7	Eukaryotic translation elongation factor 1 epsilon-1	EEF1E1	1173494	19107000	16.2821
C9J1Z8	ADP-ribosylation factor 5	ARF5	1173494	9451100	8.05381
C9J2Z5	Alpha-amylase	AMY2B	1173494	3078500	2.62336
C9J4N6	Isocitrate dehydrogenase [NADP] cytoplasmic	IDH1	1173494	4867700	4.14804
F8WCJ1	Eukaryotic translation initiation factor 5A	EIF5A2	4743000	31012000	6.53848
C9J592	Ras-related protein Rab-7a	RAB7A	1173494	4452900	3.79457
C9J8D4	Mannosyl-oligosaccharide glucosidase	MOGS	1173494	8280000	7.05585
C9JA05	Immunoglobulin J chain	JCHAIN	1173494	8744300	7.45151
C9JJ19	28S ribosomal protein S34, mitochondrial	MRPS34	1173494	48785000	41.5724
C9JXB8	60S ribosomal protein L24	RPL24	29621000	200090000	6.755
C9JQV0	Uncharacterized protein C7orf50	C7orf50	1535500	43708000	28.465
C9JZ20	Prohibitin	PHB	2731700	17236000	6.30962
D3YTB1	60S ribosomal protein L32	RPL32	41127000	286220000	6.95942
D6R9P3	Heterogeneous nuclear ribonucleoprotein A/B	HNRNPAB	34596000	75416000	2.17991
D6RA57	Translation machinery-associated protein 16	TMA16	1173494	7349400	6.26284
D6RAN8	39S ribosomal protein L27, mitochondrial	MRPL27	2046300	5500600	2.68807
D6RBE9	Annexin	ANXA5	1173494	3583500	3.0537
D6RBW1	Eukaryotic translation initiation factor 4E	EIF4E	1173494	11809000	10.0631
D6RC14	39S ribosomal protein L3, mitochondrial	MRPL3	1173494	3377700	2.87833
D6RH20	28S ribosomal protein S27, mitochondrial	MRPS27	1173494	41297000	35.1915
D6RIY6	Exosome complex component RRP45	EXOSC9	1173494	19499000	16.6162
E5RI62	E3 ubiquitin-protein ligase TRIM17	TRIM17	1173494	13490000	11.4956
E5RJR5	S-phase kinase-associated protein 1	SKP1	1173494	7508400	6.39833
E7EPB3	60S ribosomal protein L14	RPL14	189290000	785040000	4.14729
E7EPN9	Protein PRRC2C	PRRC2C	1173494	12243000	10.4329
E7EQB2	Lactotransferrin	LTF	1173494	66788000	56.9138
E7ETA6	Pericentriolar material 1 protein	PCM1	1173494	11549000	9.84155
E7EU96	Casein kinase II subunit alpha 3	CSNK2A1	1173494	7169300	6.10936
E7EUU4	Eukaryotic translation initiation factor 4 gamma 1	EIF4G1	9392200	130190000	13.8615
E9PB61	THO complex subunit 4	ALYREF	16174000	69542000	4.29962
E9PE20	Signal recognition particle 9 kDa protein	SRP9	1173494	29199000	24.8821
E9PF19	Transducin beta-like protein 2	TBL2	1173494	12398000	10.565
E9PH82	Protein FAM98A	FAM98A	3714600	14269000	3.84133
E9PK91		BCLAF1	1173494	4003900	3.41195
E9PKD5	26S protease regulatory subunit 6A	PSMC3	1173494	9506200	8.10077
E9PKG1	Protein arginine N-methyltransferase 1	PRMT1	7832400	43910000	5.6062
E9PKP7	Nucleolar transcription factor 1	UBTF	1173494	6892900	5.87383
E9PLL6	60S ribosomal protein L27a	RPL27A	47978000	224950000	4.68861
E9PLT0	Cold shock domain-containing protein E1	CSDE1	1173494	8490600	7.23532
E9PR30	40S ribosomal protein S30	FAU	29746000	94722000	3.18436
F2Z2Q9	Low molecular weight phosphotyrosine protein phosphatase	ACP1	1173494	4037000	3.44015
F5GYQ2	Multifunctional methyltransferase subunit TRM112-like protein	TRMT112	1173494	9679700	8.24861
F5H2B9	Uveal autoantigen with coiled-coil domains and ankyrin repeats	UACA	1173494	2504300	2.13405
F5H702	39S ribosomal protein L48, mitochondrial	MRPL48	1173494	28296000	24.1126
F6VRR5	Polymerase delta-interacting protein 3	POLDIP3	3397100	9528600	2.80492
F8VVY2	E3 ubiquitin-protein ligase NRDP1	RNF41	1173494	3967200	3.38067
F8VPD4	CAD protein	CAD	1173494	5865100	4.99798
F8VR82	Serine/threonine-protein phosphatase	PPP1CC	1173494	5965800	5.08379
F8VVM2	Phosphate carrier protein, mitochondrial	SLC25A3	1173494	17320000	14.7593
F8VZI8		METTL21B	1173494	5047900	4.3016
H3BRU6	Poly(rC)-binding protein 2	PCBP2	13011000	59089000	4.54146
F8W6I7	Heterogeneous nuclear ribonucleoprotein A1	HNRNPA1	187270000	410640000	2.19277
F8W7C6	60S ribosomal protein L10	RPL10	116160000	311270000	2.67967
F8WAE5	Eukaryotic translation initiation factor 2A	EIF2A	1173494	13382000	11.4036
G3V153	Caprin-1	CAPRIN1	2570700	25798000	10.0354
G3V3U4	Proteasome subunit alpha type	PSMA6	5147200	24220000	4.70547
G3V3A4	SNW domain-containing protein 1	SNW1	1173494	5205400	4.43581
G3V461	Creatine kinase B-type	CKB	1173494	4355500	3.71157
G3V4C6	UPF0568 protein C14orf166	C14orf166	4022300	35752000	8.88845
G3V529	ATP-dependent RNA helicase DDX24	DDX24	1173494	5517700	4.70194
G5E972	Lamina-associated polypeptide 2, isoforms beta/gamma	TMPO	11166000	32946000	2.95056
G5E9W7	28S ribosomal protein S22, mitochondrial	MRPS22	1173494	32670000	27.8399
Q2L6G8	Corneodesmosin	CDSN	17201000	43622000	2.53602
H0Y5B4	60S ribosomal protein L36a-like	RPL36A	1173494	15271000	13.0133
H0YE76	Activating signal cointegrator 1 complex subunit 1	ASCC1	1173494	4925100	4.19695
H0YCR7	Ribonuclease inhibitor	RNH1	1173494	3042600	2.59277
H0YHA7	60S ribosomal protein L18	RPL18	61083000	513470000	8.4061
H0YKD8	60S ribosomal protein L28	RPL28	17731000	315360000	17.7858
H0YMZ1	Proteasome subunit alpha type	PSMA4	1173494	52541000	44.7731
H0YLA2	Signal recognition particle 14 kDa protein	SRP14	1173494	21684000	18.4782
H3BLV9	SRSF protein kinase 1	SRPK1	6165400	26403000	4.28245
H3BV41	Cleavage and polyadenylation specificity factor subunit 5	NUDT21	1173494	4493900	3.8295
H3BNS8	Ubiquitin carboxyl-terminal hydrolase 10	USP10	1173494	4931300	4.20224
H3BPE7	RNA-binding protein FUS	FUS	18401000	51046000	2.77409
H3BQQ2	Zinc finger protein 598	ZNF598	1173494	4215500	3.59226
H3BS42	Zinc finger protein 768	ZNF768	1173494	2872000	2.44739
H7BXY3	Putative ATP-dependent RNA helicase DHX30	DHX30	6333500	66552000	10.5079
H7C0C0	General transcription factor 3C polypeptide 3	GTF3C3	1173494	7367500	6.27826
H7C2Q8	Probable rRNA-processing protein EBP2	EBNA1BP2	1173494	23348000	19.8961
H7C4H2	Signal recognition particle receptor subunit beta	SRPRB	1173494	2894800	2.46682
I1E4Y6	PERQ amino acid-rich with GYF domain-containing protein 2	GIGYF2	1173494	27973000	23.8374
I3L1P8	Mitochondrial 2-oxoglutarate/malate carrier protein	SLC25A11	1181700	3650200	3.08894
J3KPS3	Fructose-bisphosphate aldolase	ALDOA	2947000	21261000	7.21446
M0QXG9	BRISC and BRCA1-A complex member 1	BABAM1	1173494	2365800	2.01603
J3QS14	Leucine-rich repeat-containing protein 48	LRRC48	1173494	9798900	8.35019
J3KRG2	Gasdermin-A	GSDMA	10020000	33402000	3.33353
J3KS15	Peptidyl-tRNA hydrolase ICT1, mitochondrial	ICT1	3270000	20780000	6.35474
J3KTA4	Probable ATP-dependent RNA helicase DDX5	DDX5	10136000	89749000	8.85448
J3KTD7		SMG8	1173494	4141900	3.52955
J3QR09	Ribosomal protein L19	RPL19	79007000	589520000	7.46162
J3QQS1	28S ribosomal protein S7, mitochondrial	MRPS7	1173494	29674000	25.2869
J3QQM1	26S protease regulatory subunit 8	PSMC5	1997500	9659600	4.83584
J3QSV6	Ribosomal L1 domain-containing protein 1	RSL1D1	1173494	4227600	3.60257
K7EJC1	26S proteasome non-ATPase regulatory subunit 8	PSMD8	1173494	11197000	9.54159
K7EJT5	60S ribosomal protein L22	RPL22	4529000	47238000	10.4301
K7ELQ0	39S ribosomal protein L4, mitochondrial	MRPL4	15467000	33283000	2.15187
K7EMS3		KRT19	1173494	9642400	8.21683
K7ENG2	Splicing factor U2AF 65 kDa subunit	U2AF2	1173494	4023000	3.42822
K7ES31	Eukaryotic translation initiation factor 3 subunit K	EIF3K	1173494	16682000	14.2157
M0R050	Exosome complex component RRP46	EXOSC5	1173494	11377000	9.69498
M0R0F0	40S ribosomal protein S5	RPS5	35999000	191220000	5.31181
M0R0Y3	RuvB-like 2	RUVBL2	1173494	9374800	7.98879
M0R3D6	60S ribosomal protein L18a	RPL18A	1173494	129740000	110.559
O00139	Kinesin-like protein KIF2A	KIF2A	4580500	9957300	2.17385
O00178	GTP-binding protein 1	GTPBP1	1173494	17398000	14.8258
O00231	26S proteasome non-ATPase regulatory subunit 11	PSMD11	1173494	16876000	14.381
O00232	26S proteasome non-ATPase regulatory subunit 12	PSMD12	1173494	7984300	6.80387
O00303	Eukaryotic translation initiation factor 3 subunit F	EIF3F	6901400	80994000	11.7359
O00425	Insulin-like growth factor 2 mRNA-binding protein 3	IGF2BP3	1173494	10225000	8.7133
O00487	26S proteasome non-ATPase regulatory subunit 14	PSMD14	1173494	5890500	5.01963
O00505	Importin subunit alpha-4	KPNA3	1173494	18212000	15.5195
O14818	Proteasome subunit alpha type-7	PSMA7	2442000	14927000	6.11261
O15226	NF-kappa-B-repressing factor	NKRF	1173494	15092000	12.8607
O15371	Eukaryotic translation initiation factor 3 subunit D	EIF3D	1173494	3499000	2.98169
O15381	Nuclear valosin-containing protein-like	NVL	1173494	13983000	11.9157
O43164	E3 ubiquitin-protein ligase Praja-2	PJA2	1173494	6778200	5.77608
O43175	D-3-phosphoglycerate dehydrogenase	PHGDH	1990900	11794000	5.92395
O43290	U4/U6.U5 tri-snRNP-associated protein 1	SART1	9178600	35576000	3.87597
O43318	Mitogen-activated protein kinase kinase kinase 7	MAP3K7	19618000	65042000	3.31542
O43663	Protein regulator of cytokinesis 1	PRC1	1173494	8401800	7.15964
O60506	Heterogeneous nuclear ribonucleoprotein Q	SYNCRIP	14878000	37556000	2.52426
O60783	28S ribosomal protein S14, mitochondrial	MRPS14	1173494	12667000	10.7943
O75330	Hyaluronan mediated motility receptor	HMMR	1173494	2985500	2.54411
O75342	Arachidonate 12-lipoxygenase, 12R-type	ALOX12B	1173494	3549700	3.0249
O75394	39S ribosomal protein L33, mitochondrial	MRPL33	1173494	3662600	3.12111
O75643	U5 small nuclear ribonucleoprotein 200 kDa helicase	SNRNP200	23551000	49725000	2.11138
O75821	Eukaryotic translation initiation factor 3 subunit G	EIF3G	1173494	28041000	23.8953
O75934	Pre-mRNA-splicing factor SPF27	BCAS2	3727300	16267000	4.36429
O94776	Metastasis-associated protein MTA2	MTA2	1173494	3020100	2.5736
O94992	Protein HEXIM1	HEXIM1	1173494	3845400	3.27688
O95218	Zinc finger Ran-binding domain-containing protein 2	ZRANB2	3311300	8408300	2.53927
O95400	CD2 antigen cytoplasmic tail-binding protein 2	CD2BP2	1173494	4020200	3.42584
O95816	BAG family molecular chaperone regulator 2	BAG2	1173494	15314000	13.0499
O95831	Apoptosis-inducing factor 1, mitochondrial	AIFM1	1173494	14825000	12.6332
P00338	L-lactate dehydrogenase A chain	LDHA	1173494	11307000	9.63533
P01040	Cystatin-A	CSTA	5975400	33097000	5.53888
P01834	Ig kappa chain C region	IGKC	2718800	9556100	3.51482
P01876	Ig alpha-1 chain C region	IGHA1	1173494	26660000	22.7185
P04040	Catalase	CAT	17286000	50002000	2.89263
Q5T3N1	Annexin	ANXA1	1173494	5546600	4.72657
P04259	Keratin, type II cytoskeletal 6B	KRT6B	1173494	23179000	19.7521
P04843	Dolichyl-diphosphooligosaccharide--protein glycosyltransferase subunit 1	RPN1	1173494	15624000	13.3141
P05089	Arginase-1	ARG1	33406000	126160000	3.77657
P05109	Protein S100-A8	S100A8	59326000	146070000	2.46216
P05141	ADP/ATP translocase 2	SLC25A5	220700000	566070000	2.56488
P05198	Eukaryotic translation initiation factor 2 subunit 1	EIF2S1	23693000	78651000	3.31959
P05386	60S acidic ribosomal protein P1	RPLP1	1173494	7493300	6.38546
P05387	60S acidic ribosomal protein P2	RPLP2	142700000	846610000	5.9328
P05388	60S acidic ribosomal protein P0	RPLP0	135130000	649160000	4.80397
P05455	Lupus La protein	SSB	1173494	10347000	8.81726
P06702	Protein S100-A9	S100A9	97620000	262090000	2.6848
P06748	Nucleophosmin	NPM1	153860000	843820000	5.48434
P07355	Annexin A2	ANXA2	71401000	159890000	2.23932
P07814	Bifunctional glutamate/proline--tRNA ligase	EPRS	37972000	108680000	2.86211
P08559	Pyruvate dehydrogenase E1 component subunit alpha, somatic form, mitochondrial	PDHA1	1173494	8889300	7.57507
P08621	U1 small nuclear ribonucleoprotein 70 kDa	SNRNP70	1173494	7646000	6.51559
P09874	Poly [ADP-ribose] polymerase 1	PARP1	204410000	570860000	2.79272
P0DOY3	Ig lambda-1 chain C regions	IGLL5	2869600	6697900	2.33409
P10599	Thioredoxin	TXN	58804000	161830000	2.75202
P10644	cAMP-dependent protein kinase type I-alpha regulatory subunit	PRKAR1A	2157600	22558000	10.4551
P10809	60 kDa heat shock protein, mitochondrial	HSPD1	15595000	47088000	3.01943
P11021	78 kDa glucose-regulated protein	HSPA5	88407000	343040000	3.88024
P11142	Heat shock cognate 71 kDa protein	HSPA8	485420000	1185100000	2.44139
P11177	Pyruvate dehydrogenase E1 component subunit beta, mitochondrial	PDHB	1846300	12258000	6.63922
P11586	C-1-tetrahydrofolate synthase, cytoplasmic	MTHFD1	9721800	121690000	12.5172
P11940	Polyadenylate-binding protein 1	PABPC1	60487000	471340000	7.79242
P12236	ADP/ATP translocase 3	SLC25A6	15120000	39631000	2.6211
P12273	Prolactin-inducible protein	PIP	21232000	107880000	5.08101
P12956	X-ray repair cross-complementing protein 6	XRCC6	39249000	268570000	6.84272
P13010	X-ray repair cross-complementing protein 5	XRCC5	37000000	229330000	6.19811
P13639	Elongation factor 2	EEF2	28289000	63744000	2.25331
P14618	Pyruvate kinase PKM	PKM	28186000	79507000	2.8208
P14868	Aspartate--tRNA ligase, cytoplasmic	DARS	26356000	183220000	6.95174
P14923	Junction plakoglobin	JUP	245950000	596770000	2.42639
P15880	40S ribosomal protein S2	RPS2	189180000	407250000	2.15271
P16989	Y-box-binding protein 3	YBX3	10824000	43184000	3.98965
P17066	Heat shock 70 kDa protein 6	HSPA6	33360000	83800000	2.51199
P18077	60S ribosomal protein L35a	RPL35A	1173494	247600000	210.994
P18124	60S ribosomal protein L7	RPL7	70417000	556300000	7.90008
P19338	Nucleolin	NCL	339390000	1103800000	3.25231
P19474	E3 ubiquitin-protein ligase TRIM21	TRIM21	1273900	12917000	10.1397
P20042	Eukaryotic translation initiation factor 2 subunit 2	EIF2S2	5437400	23901000	4.39567
P20618	Proteasome subunit beta type-1	PSMB1	8527900	31668000	3.71346
P22735	Protein-glutamine gamma-glutamyltransferase K	TGM1	4004100	44315000	11.0674
P23396	40S ribosomal protein S3	RPS3	159090000	688940000	4.3305
P23528	Cofilin-1	CFL1	3116000	49373000	15.845
P24534	Elongation factor 1-beta	EEF1B2	20141000	65091000	3.23177
P25205	DNA replication licensing factor MCM3	MCM3	1173494	5635300	4.80215
P25311	Zinc-alpha-2-glycoprotein	AZGP1	6610500	49323000	7.46131
P25398	40S ribosomal protein S12	RPS12	84802000	376330000	4.43775
P25786	Proteasome subunit alpha type-1	PSMA1	1173494	14845000	12.6503
P25788	Proteasome subunit alpha type-3	PSMA3	1173494	4188100	3.56891
P26196	Probable ATP-dependent RNA helicase DDX6	DDX6	1173494	55654000	47.4259
P26358	DNA (cytosine-5)-methyltransferase 1	DNMT1	1173494	3110600	2.65072
P26373	60S ribosomal protein L13	RPL13	365750000	1437800000	3.9311
P27348	14-3-3 protein theta	YWHAQ	1173494	17373000	14.8045
P27824	Calnexin	CANX	1173494	9539900	8.12948
P28066	Proteasome subunit alpha type-5	PSMA5	4540700	21182000	4.66492
P28070	Proteasome subunit beta type-4	PSMB4	4175600	13654000	3.26995
P28072	Proteasome subunit beta type-6	PSMB6	1173494	15637000	13.3252
P28074	Proteasome subunit beta type-5	PSMB5	2095700	8729900	4.16562
P29508	Serpin B3	SERPINB3	8422900	28150000	3.34208
P29692	Elongation factor 1-delta	EEF1D	20660000	81136000	3.9272
P30050	60S ribosomal protein L12	RPL12	15272000	608850000	39.8671
P31025	Lipocalin-1	LCN1	1173494	114690000	97.7338
P31151	Protein S100-A7	S100A7	1173494	20817000	17.7393
P31689	DnaJ homolog subfamily A member 1	DNAJA1	1173494	11993000	10.2199
P31944	Caspase-14	CASP14	48513000	200960000	4.14239
P32969	60S ribosomal protein L9	RPL9	32511000	385290000	11.8511
P33402	Guanylate cyclase soluble subunit alpha-2	GUCY1A2	1173494	24188000	20.612
P35249	Replication factor C subunit 4	RFC4	1173494	8725200	7.43523
P35250	Replication factor C subunit 2	RFC2	1173494	8040700	6.85193
P36578	60S ribosomal protein L4	RPL4	131750000	707480000	5.36987
P38159	RNA-binding motif protein, X chromosome	RBMX	20009000	42860000	2.14204
P38646	Stress-70 protein, mitochondrial	HSPA9	59004000	175890000	2.98098
P39019	40S ribosomal protein S19	RPS19	136940000	756380000	5.52344
P39023	60S ribosomal protein L3	RPL3	45528000	266060000	5.84388
P40222	Alpha-taxilin	TXLNA	1173494	3507000	2.98851
P40227	T-complex protein 1 subunit zeta	CCT6A	31377000	74510000	2.37467
P40429	60S ribosomal protein L13a	RPL13A	66559000	347330000	5.21838
P40938	Replication factor C subunit 3	RFC3	1173494	3988400	3.39874
P41091	Eukaryotic translation initiation factor 2 subunit 3	EIF2S3	15549000	117270000	7.54196
P42285	Superkiller viralicidic activity 2-like 2	SKIV2L2	1173494	16531000	14.087
P42357	Histidine ammonia-lyase	HAL	3967400	31781000	8.01054
P42677	40S ribosomal protein S27	RPS27	19465000	92121000	4.73265
P42704	Leucine-rich PPR motif-containing protein, mitochondrial	LRPPRC	1173494	3261800	2.77956
P42766	60S ribosomal protein L35	RPL35	26797000	191750000	7.15565
P43686	26S protease regulatory subunit 6B	PSMC4	1173494	3501500	2.98382
P46087	Probable 28S rRNA (cytosine(4447)-C(5))-methyltransferase	NOP2	1173494	44531000	37.9474
P46777	60S ribosomal protein L5	RPL5	15975000	218420000	13.6726
P46778	60S ribosomal protein L21	RPL21	8525900	255700000	29.991
P46783	40S ribosomal protein S10	RPS10	61299000	377420000	6.15703
P46821	Microtubule-associated protein 1B	MAP1B	28183000	58792000	2.08608
P46940	Ras GTPase-activating-like protein IQGAP1	IQGAP1	78822000	247390000	3.13859
P47897	Glutamine--tRNA ligase	QARS	20647000	66994000	3.24473
P47914	60S ribosomal protein L29	RPL29	23664000	150560000	6.36241
P48634	Protein PRRC2A	PRRC2A	1173494	21840000	18.6111
P49207	60S ribosomal protein L34	RPL34	21208000	179180000	8.4487
P49368	T-complex protein 1 subunit gamma	CCT3	29748000	83772000	2.81605
P49674	Casein kinase I isoform epsilon	CSNK1E	1173494	4115300	3.50688
P49721	Proteasome subunit beta type-2	PSMB2	1173494	4579500	3.90245
P50402	Emerin	EMD	1173494	4384000	3.73585
P50750	Cyclin-dependent kinase 9	CDK9	1173494	7049100	6.00693
P51116	Fragile X mental retardation syndrome-related protein 2	FXR2	1173494	2746900	2.34079
P51659	Peroxisomal multifunctional enzyme type 2	HSD17B4	1472300	4119900	2.79827
P51665	26S proteasome non-ATPase regulatory subunit 7	PSMD7	1173494	8457000	7.20668
P51991	Heterogeneous nuclear ribonucleoprotein A3	HNRNPA3	16302000	57858000	3.54914
P52292	Importin subunit alpha-1	KPNA2	2964600	67022000	22.6074
P52597	Heterogeneous nuclear ribonucleoprotein F	HNRNPF	1173494	5229300	4.45618
P52756	RNA-binding protein 5	RBM5	4511700	13695000	3.03544
P52815	39S ribosomal protein L12, mitochondrial	MRPL12	14767000	77170000	5.22584
P53999	Activated RNA polymerase II transcriptional coactivator p15	SUB1	1173494	33634000	28.6614
P54136	Arginine--tRNA ligase, cytoplasmic	RARS	1173494	41684000	35.5213
Q5VWC4	26S proteasome non-ATPase regulatory subunit 4	PSMD4	1173494	5662500	4.82533
P55072	Transitional endoplasmic reticulum ATPase	VCP	7951000	89659000	11.2764
P55884	Eukaryotic translation initiation factor 3 subunit B	EIF3B	2625600	19132000	7.28672
P56182	Ribosomal RNA processing protein 1 homolog A	RRP1	1173494	3096900	2.63904
P56192	Methionine--tRNA ligase, cytoplasmic	MARS	6461100	61982000	9.5931
P56537	Eukaryotic translation initiation factor 6	EIF6	5472000	21409000	3.91246
P60866	40S ribosomal protein S20	RPS20	20796000	137410000	6.60752
R4GMT0	Alpha-centractin	ACTR1A	1173494	25340000	21.5936
P61254	60S ribosomal protein L26	RPL26	19304000	226580000	11.7375
P61313	60S ribosomal protein L15	RPL15	13294000	555650000	41.7971
P61353	60S ribosomal protein L27	RPL27	8806600	143520000	16.2969
P61513	60S ribosomal protein L37a	RPL37A	2207000	80097000	36.2923
P62081	40S ribosomal protein S7	RPS7	65959000	205060000	3.1089
P62191	26S protease regulatory subunit 4	PSMC1	1173494	3822500	3.25737
P62241	40S ribosomal protein S8	RPS8	271040000	730380000	2.69473
P62244	40S ribosomal protein S15a	RPS15A	33616000	225900000	6.72001
P62249	40S ribosomal protein S16	RPS16	76638000	453660000	5.91952
P62258	14-3-3 protein epsilon	YWHAE	3988000	9248200	2.31901
P62263	40S ribosomal protein S14	RPS14	79969000	433390000	5.41948
P62266	40S ribosomal protein S23	RPS23	52507000	335250000	6.38486
P62269	40S ribosomal protein S18	RPS18	203930000	790590000	3.87677
P62273	40S ribosomal protein S29	RPS29	8607700	50733000	5.89391
P62277	40S ribosomal protein S13	RPS13	52219000	531990000	10.1877
P62280	40S ribosomal protein S11	RPS11	27554000	163540000	5.93525
P62304	Small nuclear ribonucleoprotein E	SNRPE	4922700	33220000	6.74833
P62306	Small nuclear ribonucleoprotein F	SNRPF	4099200	17539000	4.27864
P62314	Small nuclear ribonucleoprotein Sm D1	SNRPD1	20227000	142050000	7.02279
P62424	60S ribosomal protein L7a	RPL7A	86740000	360140000	4.15195
P62701	40S ribosomal protein S4, X isoform	RPS4X	201670000	700810000	3.47503
P62753	40S ribosomal protein S6	RPS6	162930000	400290000	2.45682
P62829	60S ribosomal protein L23	RPL23	1173494	85180000	72.5867
P62851	40S ribosomal protein S25	RPS25	51052000	427470000	8.37323
Q5JNZ5	Putative 40S ribosomal protein S26-like 1	RPS26P11	16825000	110730000	6.58128
P62857	40S ribosomal protein S28	RPS28	1173494	116540000	99.3103
P62888	60S ribosomal protein L30	RPL30	9317200	151660000	16.2774
P62899	60S ribosomal protein L31	RPL31	53577000	371570000	6.93525
P62906	60S ribosomal protein L10a	RPL10A	60710000	476450000	7.84797
P62913	60S ribosomal protein L11	RPL11	25895000	290470000	11.2172
P62917	60S ribosomal protein L8	RPL8	55278000	304310000	5.50508
P62979	Ubiquitin-40S ribosomal protein S27a	RPS27A	406420000	9026900000	22.2108
P63104	14-3-3 protein zeta/delta	YWHAZ	1173494	37873000	32.2737
P63173	60S ribosomal protein L38	RPL38	91577000	234630000	2.56211
P63244	Guanine nucleotide-binding protein subunit beta-2-like 1	GNB2L1	1173494	22052000	18.7917
P67809	Nuclease-sensitive element-binding protein 1	YBX1	19950000	196380000	9.84361
P68363	Tubulin alpha-1B chain	TUBA1B	10693000	26384000	2.46741
P69905	Hemoglobin subunit alpha	HBA1	25767000	59498000	2.30908
P78527	DNA-dependent protein kinase catalytic subunit	PRKDC	1173494	4583700	3.90603
P81605	Dermcidin	DCD	398640000	844830000	2.11928
P82932	28S ribosomal protein S6, mitochondrial	MRPS6	1173494	5638000	4.80446
Q01469	Fatty acid-binding protein, epidermal	FABP5	36698000	76941000	2.0966
Q01780	Exosome component 10	EXOSC10	1173494	21044000	17.9328
Q02413	Desmoglein-1	DSG1	365770000	742710000	2.03054
Q02878	60S ribosomal protein L6	RPL6	62157000	177230000	2.85133
Q03393	6-pyruvoyl tetrahydrobiopterin synthase	PTS	2853600	8050700	2.82124
Q07065	Cytoskeleton-associated protein 4	CKAP4	10432000	50183000	4.81049
Q08188	Protein-glutamine gamma-glutamyltransferase E	TGM3	92635000	228220000	2.46365
Q08211	ATP-dependent RNA helicase A	DHX9	67410000	153060000	2.27058
Q08379	Golgin subfamily A member 2	GOLGA2	1173494	2533200	2.15868
Q08554	Desmocollin-1	DSC1	84888000	350420000	4.12803
Q09028	Histone-binding protein RBBP4	RBBP4	22091000	93147000	4.21651
Q12789	General transcription factor 3C polypeptide 1	GTF3C1	1173494	8648800	7.37013
Q12873	Chromodomain-helicase-DNA-binding protein 3	CHD3	1173494	56368000	48.0343
Q12906	Interleukin enhancer-binding factor 3	ILF3	78237000	445760000	5.69756
Q12933	TNF receptor-associated factor 2	TRAF2	1173494	13894000	11.8399
Q12986	Transcriptional repressor NF-X1	NFX1	1173494	152710000	130.133
Q13123	Protein Red	IK	1173494	2524600	2.15135
Q13151	Heterogeneous nuclear ribonucleoprotein A0	HNRNPA0	11942000	39062000	3.27098
Q13200	26S proteasome non-ATPase regulatory subunit 2	PSMD2	5066500	14311000	2.82463
Q13263	Transcription intermediary factor 1-beta	TRIM28	33898000	223480000	6.59272
Q13283	Ras GTPase-activating protein-binding protein 1	G3BP1	2524700	51704000	20.4793
Q13347	Eukaryotic translation initiation factor 3 subunit I	EIF3I	1173494	10253000	8.73716
Q13561	Dynactin subunit 2	DCTN2	5966600	36767000	6.16214
Q13823	Nucleolar GTP-binding protein 2	GNL2	1173494	3973700	3.38621
Q13835	Plakophilin-1	PKP1	33344000	75065000	2.25123
Q13867	Bleomycin hydrolase	BLMH	24993000	110360000	4.41564
Q13868	Exosome complex component RRP4	EXOSC2	1173494	25716000	21.914
Q13895	Bystin	BYSL	8818100	74601000	8.45999
Q14008	Cytoskeleton-associated protein 5	CKAP5	65226000	183610000	2.81498
Q14011	Cold-inducible RNA-binding protein	CIRBP	1173494	16028000	13.6584
Q14103	Heterogeneous nuclear ribonucleoprotein D0	HNRNPD	50541000	178390000	3.52961
Q14244	Ensconsin	MAP7	1173494	12956000	11.0405
Q14574	Desmocollin-3	DSC3	2905900	7033100	2.42028
Q14681	BTB/POZ domain-containing protein KCTD2	KCTD2	6649300	23242000	3.49541
Q14684	Ribosomal RNA processing protein 1 homolog B	RRP1B	1173494	15757000	13.4274
Q14692	Ribosome biogenesis protein BMS1 homolog	BMS1	1173494	7940800	6.7668
Q15024	Exosome complex component RRP42	EXOSC7	1173494	7004500	5.96893
Q15046	Lysine--tRNA ligase	KARS	1173494	28669000	24.4305
Q15084	Protein disulfide-isomerase A6	PDIA6	1173494	4332800	3.69222
Q15365	Poly(rC)-binding protein 1	PCBP1	1173494	13703000	11.6771
Q15428	Splicing factor 3A subunit 2	SF3A2	5130100	30560000	5.957
Q5QPE2	Protein transport protein Sec23B	SEC23B	1173494	3288600	2.8024
Q15637	Splicing factor 1	SF1	1173494	10223000	8.71159
Q15717	ELAV-like protein 1	ELAVL1	4308300	22579000	5.24081
Q15750	TGF-beta-activated kinase 1 and MAP3K7-binding protein 1	TAB1	117020000	237790000	2.03205
Q16531	DNA damage-binding protein 1	DDB1	4925000	140350000	28.4975
Q16610	Extracellular matrix protein 1	ECM1	4844900	10148000	2.09457
Q2NL82	Pre-rRNA-processing protein TSR1 homolog	TSR1	1173494	17124000	14.5923
Q2TAY7	WD40 repeat-containing protein SMU1	SMU1	8671500	30683000	3.53837
Q3V6T2	Girdin	CCDC88A	1173494	4859400	4.14097
Q5JR04	Putative helicase MOV-10	MOV10	1173494	23535000	20.0555
Q5JTH9	RRP12-like protein	RRP12	1627900	8400000	5.16002
Q5QPA5	28S ribosomal protein S18a, mitochondrial	MRPS18A	1173494	8823500	7.519
Q5RKV6	Exosome complex component MTR3	EXOSC6	3497000	23435000	6.70146
Q5T653	39S ribosomal protein L2, mitochondrial	MRPL2	1173494	4626400	3.94241
Q5T749	Keratinocyte proline-rich protein	KPRP	29090000	85043000	2.92344
Q5T750	Skin-specific protein 32	XP32	20541000	42254000	2.05706
Q5T8A0	28S ribosomal protein S2, mitochondrial	MRPS2	1173494	8065500	6.87306
Q5T9A4	ATPase family AAA domain-containing protein 3B	ATAD3B	5677400	46631000	8.21344
Q6P158	Putative ATP-dependent RNA helicase DHX57	DHX57	1173494	4018700	3.42456
Q6P161	39S ribosomal protein L54, mitochondrial	MRPL54	1173494	4446100	3.78877
Q6P1L8	39S ribosomal protein L14, mitochondrial	MRPL14	1173494	9334800	7.95471
Q6PKG0	La-related protein 1	LARP1	7690800	43862000	5.70318
Q6Q759	Sperm-associated antigen 17	SPAG17	1173494	97313000	82.9259
Q6UXV0	GDNF family receptor alpha-like	GFRAL	1173494	7226700	6.15828
Q6ZVX7	F-box only protein 50	NCCRP1	28045000	87448000	3.11813
X6RLN4	La-related protein 4	LARP4	1173494	7776000	6.62637
Q7KZF4	Staphylococcal nuclease domain-containing protein 1	SND1	6796500	32932000	4.84544
Q7Z2W9	39S ribosomal protein L21, mitochondrial	MRPL21	1173494	23959000	20.4168
Q86UE4	Protein LYRIC	MTDH	10116000	25867000	2.55704
Q86UP2	Kinectin	KTN1	1173494	3274300	2.79021
Q86Y13	E3 ubiquitin-protein ligase DZIP3	DZIP3	1173494	5042500	4.297
Q86YT6	E3 ubiquitin-protein ligase MIB1	MIB1	1173494	5707800	4.86394
Q8IUF8	Bifunctional lysine-specific demethylase and histidyl-hydroxylase MINA	MINA	1173494	8322200	7.09181
Q8IXM3	39S ribosomal protein L41, mitochondrial	MRPL41	1173494	10130000	8.63234
Q8IY81	pre-rRNA processing protein FTSJ3	FTSJ3	1173494	5492600	4.68055
Q8IYW5	E3 ubiquitin-protein ligase RNF168	RNF168	1173494	15073000000	12844.5
Q8N3C0	Activating signal cointegrator 1 complex subunit 3	ASCC3	1173494	9364900	7.98036
V9GY48	Zinc finger CCCH-type with G patch domain-containing protein	ZGPAT	1173494	15254000	12.9988
Q8NC51	Plasminogen activator inhibitor 1 RNA-binding protein	SERBP1	170410000	587670000	3.44857
Q8NE71	ATP-binding cassette sub-family F member 1	ABCF1	1684200	51138000	30.3634
Q8NHQ1	Centrosomal protein of 70 kDa	CEP70	1173494	2733400	2.32928
Q9Y5Q3	Transcription factor MafB	MAFB	1173494	79651000	67.8751
Q8NHY2	E3 ubiquitin-protein ligase RFWD2	RFWD2	1173494	4317500	3.67918
Q8TDD1	ATP-dependent RNA helicase DDX54	DDX54	1173494	14616000	12.4551
Q8TDN6	Ribosome biogenesis protein BRX1 homolog	BRIX1	1173494	12234000	10.4253
Q8TDY2	RB1-inducible coiled-coil protein 1	RB1CC1	2247200	25463000	11.331
Q8WU90	Zinc finger CCCH domain-containing protein 15	ZC3H15	979710	31173000	31.8186
Q8WW12	PEST proteolytic signal-containing nuclear protein	PCNP	1637400	9045800	5.52449
Q8WXX5	DnaJ homolog subfamily C member 9	DNAJC9	1173494	4938800	4.20863
Q92522	Histone H1x	H1FX	3904400	80583000	20.639
Q92598	Heat shock protein 105 kDa	HSPH1	4247800	60847000	14.3244
Q92615	La-related protein 4B	LARP4B	1173494	8523500	7.26335
Q92665	28S ribosomal protein S31, mitochondrial	MRPS31	1173494	17038000	14.519
Q92900	Regulator of nonsense transcripts 1	UPF1	1173494	2460200	2.09647
Q92979	Ribosomal RNA small subunit methyltransferase NEP1	EMG1	1173494	7970000	6.79168
Q93008	Probable ubiquitin carboxyl-terminal hydrolase FAF-X	USP9X	1173494	37790000	32.203
Q93009	Ubiquitin carboxyl-terminal hydrolase 7	USP7	1173494	5009500	4.26888
Q96AG4	Leucine-rich repeat-containing protein 59	LRRC59	62674000	171660000	2.73893
Q96B26	Exosome complex component RRP43	EXOSC8	1173494	6941200	5.91499
Q96CT7	Coiled-coil domain-containing protein 124	CCDC124	14657000	52997000	3.61581
Q96EL2	28S ribosomal protein S24, mitochondrial	MRPS24	1173494	7094200	6.04537
Q96EL3	39S ribosomal protein L53, mitochondrial	MRPL53	6243100	32305000	5.17451
Q96EY7	Pentatricopeptide repeat domain-containing protein 3, mitochondrial	PTCD3	1173494	6087500	5.1875
Q96GA3	Protein LTV1 homolog	LTV1	1173494	5357900	4.56577
Q96HR8	H/ACA ribonucleoprotein complex non-core subunit NAF1	NAF1	1173494	5549300	4.72887
Q96HS1	Serine/threonine-protein phosphatase PGAM5, mitochondrial	PGAM5	2877200	36163000	12.5688
Q96JK2	DDB1- and CUL4-associated factor 5	DCAF5	1173494	13069000	11.1368
Q96P63	Serpin B12	SERPINB12	9177700	51661000	5.62897
Q96PK6	RNA-binding protein 14	RBM14	1173494	12854000	10.9536
Q96S55	ATPase WRNIP1	WRNIP1	1173494	36085000	30.7501
Q96S59	Ran-binding protein 9	RANBP9	1173494	7996200	6.81401
Q99436	Proteasome subunit beta type-7	PSMB7	1173494	6201900	5.28499
Q99575	Ribonucleases P/MRP protein subunit POP1	POP1	1173494	21708000	18.4986
Q9BQ67	Glutamate-rich WD repeat-containing protein 1	GRWD1	1800400	74017000	41.1114
Q9BQG0	Myb-binding protein 1A	MYBBP1A	10510000	46710000	4.44434
Q9BRP8	Partner of Y14 and mago	WIBG	1173494	21465000	18.2915
Q9BU76	Multiple myeloma tumor-associated protein 2	MMTAG2	4358800	21610000	4.95779
Q9BVI4	Nucleolar complex protein 4 homolog	NOC4L	1173494	5300900	4.51719
Q9BVJ6	U3 small nucleolar RNA-associated protein 14 homolog A	UTP14A	1173494	3644100	3.10534
Q9BVP2	Guanine nucleotide-binding protein-like 3	GNL3	1173494	39063000	33.2878
Q9BWF3	RNA-binding protein 4	RBM4	1173494	2574800	2.19413
Q9BWJ5	Splicing factor 3B subunit 5	SF3B5	1173494	2882800	2.4566
Q9BYC9	39S ribosomal protein L20, mitochondrial	MRPL20	1173494	11238000	9.57653
Q9BYD1	39S ribosomal protein L13, mitochondrial	MRPL13	1173494	27642000	23.5553
Q9BYD6	39S ribosomal protein L1, mitochondrial	MRPL1	11477000	23353000	2.03477
Q9BYN8	28S ribosomal protein S26, mitochondrial	MRPS26	1173494	19325000	16.4679
Q9BZE4	Nucleolar GTP-binding protein 1	GTPBP4	1173494	2911700	2.48122
Q9H0A0	N-acetyltransferase 10	NAT10	1173494	7234000	6.1645
Q9H0D6	5-3 exoribonuclease 2	XRN2	1173494	34271000	29.2042
Q9H0U6	39S ribosomal protein L18, mitochondrial	MRPL18	3835500	23120000	6.0279
Q9H0U9	Testis-specific Y-encoded-like protein 1	TSPYL1	1173494	2439000	2.07841
Q9H1I8	Activating signal cointegrator 1 complex subunit 2	ASCC2	1173494	5077900	4.32716
Q9H2U1	ATP-dependent RNA helicase DHX36	DHX36	1173494	5154000	4.39201
Q9H2W6	39S ribosomal protein L46, mitochondrial	MRPL46	3743500	31363000	8.37799
Q9H6S0	Probable ATP-dependent RNA helicase YTHDC2	YTHDC2	1173494	10038000	8.55394
Q9H7D7	WD repeat-containing protein 26	WDR26	1173494	11807000	10.0614
Q9H7E9	UPF0488 protein C8orf33	C8orf33	1173494	15139000	12.9008
Q9HC36	rRNA methyltransferase 3, mitochondrial	RNMTL1	1173494	17316000	14.7559
Q9HD33	39S ribosomal protein L47, mitochondrial	MRPL47	7281500	22751000	3.12449
Q9NPD3	Exosome complex component RRP41	EXOSC4	1173494	77396000	65.9535
Q9NR30	Nucleolar RNA helicase 2	DDX21	1173494	6186100	5.27152
Q9NRX1	RNA-binding protein PNO1	PNO1	1173494	38727000	33.0014
Q9NSI2	Protein FAM207A	FAM207A	3178600	27618000	8.68873
Q9NU02	Ankyrin repeat and EF-hand domain-containing protein 1	ANKEF1	1173494	17312000	14.7525
Q9NW13	RNA-binding protein 28	RBM28	1173494	4184400	3.56576
Q9NX20	39S ribosomal protein L16, mitochondrial	MRPL16	1173494	9501000	8.09633
Q9NX58	Cell growth-regulating nucleolar protein	LYAR	1173494	37338000	31.8178
Q9NXV2	BTB/POZ domain-containing protein KCTD5	KCTD5	77789000	159930000	2.05595
Q9NY12	H/ACA ribonucleoprotein complex subunit 1	GAR1	8394000	22872000	2.7248
Q9NZI8	Insulin-like growth factor 2 mRNA-binding protein 1	IGF2BP1	28883000	236230000	8.17886
Q9P219	Protein Daple	CCDC88C	4504900	12419000	2.75678
Q9P258	Protein RCC2	RCC2	1173494	5148100	4.38698
Q9UH99	SUN domain-containing protein 2	SUN2	1173494	3116100	2.6554
Q9UHV9	Prefoldin subunit 2	PFDN2	1173494	4986200	4.24902
Q9ULX3	RNA-binding protein NOB1	NOB1	1173494	49222000	41.9448
Q9UN86	Ras GTPase-activating protein-binding protein 2	G3BP2	6764900	17882000	2.64335
Q9UNQ2	Probable dimethyladenosine transferase	DIMT1	1173494	6161400	5.25047
Q9UQ35	Serine/arginine repetitive matrix protein 2	SRRM2	1173494	13480000	11.4871
Q9UQ80	Proliferation-associated protein 2G4	PA2G4	13431000	135030000	10.0536
Q9Y265	RuvB-like 1	RUVBL1	2269300	21006000	9.2566
Q9Y295	Developmentally-regulated GTP-binding protein 1	DRG1	1173494	56768000	48.3752
Q9Y2P8	RNA 3-terminal phosphate cyclase-like protein	RCL1	1173494	14912000	12.7074
Q9Y3B4	Splicing factor 3B subunit 6	SF3B6	1173494	4700800	4.00582
Q9Y3B7	39S ribosomal protein L11, mitochondrial	MRPL11	1173494	39153000	33.3645
Q9Y3D9	28S ribosomal protein S23, mitochondrial	MRPS23	1173494	34756000	29.6175
Q9Y3F4	Serine-threonine kinase receptor-associated protein	STRAP	1173494	3154600	2.68821
Q9Y3U8	60S ribosomal protein L36	RPL36	3843800	162010000	42.1484
Q9Y4C2	TRPM8 channel-associated factor 1	TCAF1	1173494	43384000	36.9699
Q9Y4E8	Ubiquitin carboxyl-terminal hydrolase 15	USP15	1173494	22315000	19.0159
Q9Y5A9	YTH domain-containing family protein 2	YTHDF2	1173494	6109700	5.20642
Q9Y5V3	Melanoma-associated antigen D1	MAGED1	1173494	7579000	6.45849
Q9Y6Y0	Influenza virus NS1A-binding protein	IVNS1ABP	74788000	166260000	2.22308

## Sheet: ocerlapped proteins in rep1 & 2
Protein IDs	Protein names	Gene names	FC(NFX11/Con)	FC(NFX12/Con)
A0A024R4E5	Vigilin	HDLBP	4.23977	4.03577
A0A024R4M0	40S ribosomal protein S9	RPS9	8.73071	5.65316
H0YN88	40S ribosomal protein S17	RPS17	6.67274	5.88327
A0A087WTP3	Far upstream element-binding protein 2	KHSRP	7.4953	3.86483
A0A087WUK2	Heterogeneous nuclear ribonucleoprotein D-like	HNRNPDL	35.6593	14.4236
E7ETK0	40S ribosomal protein S24	RPS24	4.3899	3.92758
A0A087WUT6	Eukaryotic translation initiation factor 5B	EIF5B	37.2428	10.4324
A0A087WVM4	Monofunctional C1-tetrahydrofolate synthase, mitochondrial	MTHFD1L	21.6325	14.2039
A0A087WW66	26S proteasome non-ATPase regulatory subunit 1	PSMD1	7.88824	6.89139
A0A087WXM6	60S ribosomal protein L17	RPL17	23.4941	24.9762
A0A087WYC1	Heat shock 70 kDa protein 4	HSPA4	22.8915	25.3193
A0A087WYN9	ATP-dependent RNA helicase DHX29	DHX29	14.785	10.4997
A0A087WZK9	Eukaryotic translation initiation factor 3 subunit H	EIF3H	31.5409	11.0755
A0A087X0X3	Heterogeneous nuclear ribonucleoprotein M	HNRNPM	4.21183	5.62122
A0A087X1A5	Double-stranded RNA-binding protein Staufen homolog 1	STAU1	2.74826	10.7061
A0A087X1B2	U4/U6.U5 tri-snRNP-associated protein 2	USP39	38.2524	10.2761
F1T0B3	ATP-dependent RNA helicase DDX1	DDX1	4.96581	2.92313
A0A087X2I1	26S protease regulatory subunit 10B	PSMC6	12.4134	5.4238
A0A0A0MRA5	Heterogeneous nuclear ribonucleoprotein U-like protein 1	HNRNPUL1	4.02405	4.11182
F6S8N6	Protein-L-isoaspartate O-methyltransferase	PCMT1	4.56406	4.18306
A0A0A0MT59	Mortality factor 4-like protein 2	MORF4L2	3.97071	2.79592
K7EM56	40S ribosomal protein S15	RPS15	105.335	160.563
A0A0D9SEM9		DDX39A	4.98111	4.46044
A0A0D9SEU5	Ran-binding protein 10	RANBP10	5.60885	2.58906
A0A0D9SFB3	ATP-dependent RNA helicase DDX3X	DDX3X	8.27191	2.37621
A0A0G2JIW1	Heat shock 70 kDa protein 1B	HSPA1B	3.86702	5.52263
A0A0J9YW13	RNA-binding protein 8A	RBM8A	6.12368	2.9223
A0A0U1RR30	Transcriptional repressor p66-beta	GATAD2B	5.51259	4.13665
A0A1X7SBZ2	Probable ATP-dependent RNA helicase DDX17	DDX17	15.3728	4.37813
A0A1W2PQS1	26S protease regulatory subunit 7	PSMC2	8.94423	3.65916
A0A1W2PRV5	Survival motor neuron protein	SMN1	9.42059	5.19099
A6NJD9	39S ribosomal protein L23, mitochondrial	MRPL23	2.639	2.80954
H7BY10	60S ribosomal protein L23a	RPL23A	4.31495	10.7903
Q49AN9	Small nuclear ribonucleoprotein G	SNRPG	18.7329	22.8599
B0QY89	Eukaryotic translation initiation factor 3 subunit L	EIF3L	40.009	3.48919
B0YIW6	Coatomer subunit delta	ARCN1	4.37028	3.01697
B1AHD1	NHP2-like protein 1	NHP2L1	3.14369	3.58144
B1AK87	F-actin-capping protein subunit beta	CAPZB	13.0993	8.187
B1ANR0	Polyadenylate-binding protein	PABPC4	155.357	16.6264
B3KXD6	Pescadillo homolog	PES1	5.16279	2.31403
B4DY09	Interleukin enhancer-binding factor 2	ILF2	4.17805	4.40499
H0YHC3	Nucleosome assembly protein 1-like 1	NAP1L1	12.3205	46.6394
E7ENZ3	T-complex protein 1 subunit epsilon	CCT5	10.7065	2.45073
B8ZZV5	39S ribosomal protein L30, mitochondrial	MRPL30	6.35086	3.59823
H0YAL7	Eukaryotic translation elongation factor 1 epsilon-1	EEF1E1	14.3818	16.2821
F8WCJ1	Eukaryotic translation initiation factor 5A	EIF5A2	6.09973	6.53848
C9J8D4	Mannosyl-oligosaccharide glucosidase	MOGS	7.38334	7.05585
C9JXB8	60S ribosomal protein L24	RPL24	4.09574	6.755
C9JZ20	Prohibitin	PHB	13.2167	6.30962
D6R9P3	Heterogeneous nuclear ribonucleoprotein A/B	HNRNPAB	3.34518	2.17991
D6RAN8	39S ribosomal protein L27, mitochondrial	MRPL27	6.11592	2.68807
D6RBE9	Annexin	ANXA5	9.41121	3.0537
D6RBW1	Eukaryotic translation initiation factor 4E	EIF4E	16.871	10.0631
D6RC14	39S ribosomal protein L3, mitochondrial	MRPL3	9.06438	2.87833
D6RH20	28S ribosomal protein S27, mitochondrial	MRPS27	7.666	35.1915
D6RIY6	Exosome complex component RRP45	EXOSC9	24.0223	16.6162
E5RJR5	S-phase kinase-associated protein 1	SKP1	7.09318	6.39833
E7EPN9	Protein PRRC2C	PRRC2C	8.75676	10.4329
E7EU96	Casein kinase II subunit alpha 3	CSNK2A1	5.90808	6.10936
E7EUU4	Eukaryotic translation initiation factor 4 gamma 1	EIF4G1	49.3654	13.8615
E9PB61	THO complex subunit 4	ALYREF	3.42488	4.29962
E9PF19	Transducin beta-like protein 2	TBL2	4.27186	10.565
E9PH82	Protein FAM98A	FAM98A	3.68115	3.84133
E9PK91		BCLAF1	8.54968	3.41195
E9PKD5	26S protease regulatory subunit 6A	PSMC3	8.60678	8.10077
E9PKG1	Protein arginine N-methyltransferase 1	PRMT1	30.7901	5.6062
E9PKP7	Nucleolar transcription factor 1	UBTF	4.48387	5.87383
E9PLL6	60S ribosomal protein L27a	RPL27A	3.58873	4.68861
F5H702	39S ribosomal protein L48, mitochondrial	MRPL48	44.0991	24.1126
F6VRR5	Polymerase delta-interacting protein 3	POLDIP3	11.048	2.80492
F8VPD4	CAD protein	CAD	15.0167	4.99798
F8VR82	Serine/threonine-protein phosphatase	PPP1CC	6.24596	5.08379
F8VVM2	Phosphate carrier protein, mitochondrial	SLC25A3	27.3022	14.7593
H3BRU6	Poly(rC)-binding protein 2	PCBP2	7.6586	4.54146
F8W6I7	Heterogeneous nuclear ribonucleoprotein A1	HNRNPA1	3.93047	2.19277
F8WAE5	Eukaryotic translation initiation factor 2A	EIF2A	11.8961	11.4036
G3V153	Caprin-1	CAPRIN1	5.55063	10.0354
G3V3U4	Proteasome subunit alpha type	PSMA6	2.86952	4.70547
G3V461	Creatine kinase B-type	CKB	8.77976	3.71157
G3V4C6	UPF0568 protein C14orf166	C14orf166	6.66957	8.88845
H0Y5B4	60S ribosomal protein L36a-like	RPL36A	23.4028	13.0133
H0YE76	Activating signal cointegrator 1 complex subunit 1	ASCC1	12.2429	4.19695
H0YHA7	60S ribosomal protein L18	RPL18	5.04527	8.4061
H0YKD8	60S ribosomal protein L28	RPL28	5.02549	17.7858
H0YMZ1	Proteasome subunit alpha type	PSMA4	65.1857	44.7731
H0YLA2	Signal recognition particle 14 kDa protein	SRP14	13.3729	18.4782
H3BLV9	SRSF protein kinase 1	SRPK1	7.03393	4.28245
H3BV41	Cleavage and polyadenylation specificity factor subunit 5	NUDT21	4.56713	3.8295
H3BPE7	RNA-binding protein FUS	FUS	4.0332	2.77409
H3BS42	Zinc finger protein 768	ZNF768	3.43061	2.44739
H7BXY3	Putative ATP-dependent RNA helicase DHX30	DHX30	17.6301	10.5079
H7C0C0	General transcription factor 3C polypeptide 3	GTF3C3	31.5997	6.27826
I3L1P8	Mitochondrial 2-oxoglutarate/malate carrier protein	SLC25A11	4.61192	3.08894
J3KPS3	Fructose-bisphosphate aldolase	ALDOA	23.5541	7.21446
J3KS15	Peptidyl-tRNA hydrolase ICT1, mitochondrial	ICT1	27.4297	6.35474
J3KTA4	Probable ATP-dependent RNA helicase DDX5	DDX5	15.3266	8.85448
J3QQS1	28S ribosomal protein S7, mitochondrial	MRPS7	3.22294	25.2869
J3QSV6	Ribosomal L1 domain-containing protein 1	RSL1D1	3.16261	3.60257
K7EJC1	26S proteasome non-ATPase regulatory subunit 8	PSMD8	11.8475	9.54159
K7EJT5	60S ribosomal protein L22	RPL22	9.49459	10.4301
K7ELQ0	39S ribosomal protein L4, mitochondrial	MRPL4	3.81975	2.15187
K7EMS3		KRT19	3.93406	8.21683
K7ENG2	Splicing factor U2AF 65 kDa subunit	U2AF2	26.981	3.42822
K7ES31	Eukaryotic translation initiation factor 3 subunit K	EIF3K	19.1906	14.2157
M0R0F0	40S ribosomal protein S5	RPS5	6.06739	5.31181
M0R0Y3	RuvB-like 2	RUVBL2	24.3333	7.98879
M0R3D6	60S ribosomal protein L18a	RPL18A	176.942	110.559
O00178	GTP-binding protein 1	GTPBP1	4.86411	14.8258
O00231	26S proteasome non-ATPase regulatory subunit 11	PSMD11	15.1812	14.381
O00232	26S proteasome non-ATPase regulatory subunit 12	PSMD12	9.72054	6.80387
O00303	Eukaryotic translation initiation factor 3 subunit F	EIF3F	15.9881	11.7359
O00425	Insulin-like growth factor 2 mRNA-binding protein 3	IGF2BP3	13.9532	8.7133
O00487	26S proteasome non-ATPase regulatory subunit 14	PSMD14	6.89454	5.01963
O14818	Proteasome subunit alpha type-7	PSMA7	7.21867	6.11261
O15226	NF-kappa-B-repressing factor	NKRF	10.8667	12.8607
O15371	Eukaryotic translation initiation factor 3 subunit D	EIF3D	77.5598	2.98169
O15381	Nuclear valosin-containing protein-like	NVL	3.00368	11.9157
O43175	D-3-phosphoglycerate dehydrogenase	PHGDH	8.52077	5.92395
O43290	U4/U6.U5 tri-snRNP-associated protein 1	SART1	9.39991	3.87597
O43318	Mitogen-activated protein kinase kinase kinase 7	MAP3K7	11.9105	3.31542
O43663	Protein regulator of cytokinesis 1	PRC1	33.661	7.15964
O60506	Heterogeneous nuclear ribonucleoprotein Q	SYNCRIP	6.3608	2.52426
O75394	39S ribosomal protein L33, mitochondrial	MRPL33	6.89036	3.12111
O75643	U5 small nuclear ribonucleoprotein 200 kDa helicase	SNRNP200	23.855	2.11138
O75821	Eukaryotic translation initiation factor 3 subunit G	EIF3G	52.0565	23.8953
O75934	Pre-mRNA-splicing factor SPF27	BCAS2	8.62179	4.36429
O94776	Metastasis-associated protein MTA2	MTA2	15.3056	2.5736
O95218	Zinc finger Ran-binding domain-containing protein 2	ZRANB2	4.25452	2.53927
O95400	CD2 antigen cytoplasmic tail-binding protein 2	CD2BP2	3.98374	3.42584
O95831	Apoptosis-inducing factor 1, mitochondrial	AIFM1	4.83343	12.6332
P00338	L-lactate dehydrogenase A chain	LDHA	40.3223	9.63533
P01040	Cystatin-A	CSTA	6.73846	5.53888
P01876	Ig alpha-1 chain C region	IGHA1	2.50611	22.7185
P04259	Keratin, type II cytoskeletal 6B	KRT6B	15.7802	19.7521
P04843	Dolichyl-diphosphooligosaccharide--protein glycosyltransferase subunit 1	RPN1	7.20651	13.3141
P05089	Arginase-1	ARG1	2.99527	3.77657
P05109	Protein S100-A8	S100A8	2.20005	2.46216
P05141	ADP/ATP translocase 2	SLC25A5	3.65478	2.56488
P05198	Eukaryotic translation initiation factor 2 subunit 1	EIF2S1	4.2329	3.31959
P05388	60S acidic ribosomal protein P0	RPLP0	3.88826	4.80397
P05455	Lupus La protein	SSB	7.02773	8.81726
P06702	Protein S100-A9	S100A9	2.35106	2.6848
P06748	Nucleophosmin	NPM1	2.21546	5.48434
P07814	Bifunctional glutamate/proline--tRNA ligase	EPRS	7.78205	2.86211
P08559	Pyruvate dehydrogenase E1 component subunit alpha, somatic form, mitochondrial	PDHA1	20.2046	7.57507
P08621	U1 small nuclear ribonucleoprotein 70 kDa	SNRNP70	11.424	6.51559
P09874	Poly [ADP-ribose] polymerase 1	PARP1	3.29632	2.79272
P10599	Thioredoxin	TXN	2.27672	2.75202
P10644	cAMP-dependent protein kinase type I-alpha regulatory subunit	PRKAR1A	8.82138	10.4551
P10809	60 kDa heat shock protein, mitochondrial	HSPD1	5.65277	3.01943
P11021	78 kDa glucose-regulated protein	HSPA5	2.27652	3.88024
P11142	Heat shock cognate 71 kDa protein	HSPA8	3.00729	2.44139
P11177	Pyruvate dehydrogenase E1 component subunit beta, mitochondrial	PDHB	32.232	6.63922
P11586	C-1-tetrahydrofolate synthase, cytoplasmic	MTHFD1	9.99702	12.5172
P11940	Polyadenylate-binding protein 1	PABPC1	29.2278	7.79242
P12236	ADP/ATP translocase 3	SLC25A6	3.68981	2.6211
P12956	X-ray repair cross-complementing protein 6	XRCC6	8.80863	6.84272
P13010	X-ray repair cross-complementing protein 5	XRCC5	7.39676	6.19811
P13639	Elongation factor 2	EEF2	5.85669	2.25331
P14618	Pyruvate kinase PKM	PKM	3.67523	2.8208
P14868	Aspartate--tRNA ligase, cytoplasmic	DARS	10.0387	6.95174
P15880	40S ribosomal protein S2	RPS2	4.97759	2.15271
P17066	Heat shock 70 kDa protein 6	HSPA6	2.77284	2.51199
P18077	60S ribosomal protein L35a	RPL35A	34.2115	210.994
P18124	60S ribosomal protein L7	RPL7	3.85418	7.90008
P19338	Nucleolin	NCL	2.01718	3.25231
P19474	E3 ubiquitin-protein ligase TRIM21	TRIM21	24.7421	10.1397
P20042	Eukaryotic translation initiation factor 2 subunit 2	EIF2S2	13.0728	4.39567
P22735	Protein-glutamine gamma-glutamyltransferase K	TGM1	3.60655	11.0674
P23396	40S ribosomal protein S3	RPS3	7.83959	4.3305
P23528	Cofilin-1	CFL1	9.96438	15.845
P25205	DNA replication licensing factor MCM3	MCM3	4.76824	4.80215
P25398	40S ribosomal protein S12	RPS12	3.7209	4.43775
P25786	Proteasome subunit alpha type-1	PSMA1	6.70195	12.6503
P25788	Proteasome subunit alpha type-3	PSMA3	17.4147	3.56891
P26196	Probable ATP-dependent RNA helicase DDX6	DDX6	37.2631	47.4259
P26358	DNA (cytosine-5)-methyltransferase 1	DNMT1	11.4197	2.65072
P27348	14-3-3 protein theta	YWHAQ	21.4351	14.8045
P28066	Proteasome subunit alpha type-5	PSMA5	4.42024	4.66492
P28072	Proteasome subunit beta type-6	PSMB6	14.5378	13.3252
P28074	Proteasome subunit beta type-5	PSMB5	8.58568	4.16562
P29692	Elongation factor 1-delta	EEF1D	5.43998	3.9272
P30050	60S ribosomal protein L12	RPL12	19.8566	39.8671
P31025	Lipocalin-1	LCN1	5.24008	97.7338
P31151	Protein S100-A7	S100A7	4.17778	17.7393
P31689	DnaJ homolog subfamily A member 1	DNAJA1	21.3934	10.2199
P32969	60S ribosomal protein L9	RPL9	13.6806	11.8511
P35249	Replication factor C subunit 4	RFC4	3.68387	7.43523
P35250	Replication factor C subunit 2	RFC2	2.03964	6.85193
P36578	60S ribosomal protein L4	RPL4	6.56911	5.36987
P38159	RNA-binding motif protein, X chromosome	RBMX	2.54585	2.14204
P38646	Stress-70 protein, mitochondrial	HSPA9	3.43129	2.98098
P39019	40S ribosomal protein S19	RPS19	3.46758	5.52344
P39023	60S ribosomal protein L3	RPL3	9.18468	5.84388
P40227	T-complex protein 1 subunit zeta	CCT6A	5.48268	2.37467
P40429	60S ribosomal protein L13a	RPL13A	3.10026	5.21838
P41091	Eukaryotic translation initiation factor 2 subunit 3	EIF2S3	14.2639	7.54196
P42285	Superkiller viralicidic activity 2-like 2	SKIV2L2	12.4466	14.087
P42677	40S ribosomal protein S27	RPS27	7.25353	4.73265
P42704	Leucine-rich PPR motif-containing protein, mitochondrial	LRPPRC	54.711	2.77956
P42766	60S ribosomal protein L35	RPL35	2.8639	7.15565
P43686	26S protease regulatory subunit 6B	PSMC4	3.76074	2.98382
P46087	Probable 28S rRNA (cytosine(4447)-C(5))-methyltransferase	NOP2	6.67519	37.9474
P46777	60S ribosomal protein L5	RPL5	10.0889	13.6726
P46778	60S ribosomal protein L21	RPL21	15.84	29.991
P46783	40S ribosomal protein S10	RPS10	5.47513	6.15703
P46821	Microtubule-associated protein 1B	MAP1B	6.7381	2.08608
P46940	Ras GTPase-activating-like protein IQGAP1	IQGAP1	3.21344	3.13859
P47897	Glutamine--tRNA ligase	QARS	3.52492	3.24473
P47914	60S ribosomal protein L29	RPL29	2.73204	6.36241
P48634	Protein PRRC2A	PRRC2A	30.6538	18.6111
P49207	60S ribosomal protein L34	RPL34	4.26226	8.4487
P49368	T-complex protein 1 subunit gamma	CCT3	9.33306	2.81605
P49674	Casein kinase I isoform epsilon	CSNK1E	9.18198	3.50688
P49721	Proteasome subunit beta type-2	PSMB2	3.22754	3.90245
P50402	Emerin	EMD	2.99345	3.73585
P50750	Cyclin-dependent kinase 9	CDK9	14.1833	6.00693
P51659	Peroxisomal multifunctional enzyme type 2	HSD17B4	3.80459	2.79827
P51665	26S proteasome non-ATPase regulatory subunit 7	PSMD7	6.99168	7.20668
P51991	Heterogeneous nuclear ribonucleoprotein A3	HNRNPA3	6.93841	3.54914
P52292	Importin subunit alpha-1	KPNA2	14.8971	22.6074
P52597	Heterogeneous nuclear ribonucleoprotein F	HNRNPF	12.8659	4.45618
P52756	RNA-binding protein 5	RBM5	7.55791	3.03544
P52815	39S ribosomal protein L12, mitochondrial	MRPL12	2.47085	5.22584
P53999	Activated RNA polymerase II transcriptional coactivator p15	SUB1	13.9506	28.6614
P54136	Arginine--tRNA ligase, cytoplasmic	RARS	64.146	35.5213
Q5VWC4	26S proteasome non-ATPase regulatory subunit 4	PSMD4	4.74003	4.82533
P55072	Transitional endoplasmic reticulum ATPase	VCP	6.7018	11.2764
P55884	Eukaryotic translation initiation factor 3 subunit B	EIF3B	102.853	7.28672
P56182	Ribosomal RNA processing protein 1 homolog A	RRP1	2.9788	2.63904
P56192	Methionine--tRNA ligase, cytoplasmic	MARS	11.9927	9.5931
P56537	Eukaryotic translation initiation factor 6	EIF6	2.41996	3.91246
P60866	40S ribosomal protein S20	RPS20	12.1225	6.60752
R4GMT0	Alpha-centractin	ACTR1A	16.9426	21.5936
P61254	60S ribosomal protein L26	RPL26	9.85651	11.7375
P61313	60S ribosomal protein L15	RPL15	6.45524	41.7971
P61353	60S ribosomal protein L27	RPL27	8.8738	16.2969
P61513	60S ribosomal protein L37a	RPL37A	4.77164	36.2923
P62081	40S ribosomal protein S7	RPS7	3.84557	3.1089
P62241	40S ribosomal protein S8	RPS8	2.88983	2.69473
P62244	40S ribosomal protein S15a	RPS15A	6.2497	6.72001
P62249	40S ribosomal protein S16	RPS16	5.36992	5.91952
P62258	14-3-3 protein epsilon	YWHAE	6.69258	2.31901
P62263	40S ribosomal protein S14	RPS14	3.44971	5.41948
P62266	40S ribosomal protein S23	RPS23	4.8205	6.38486
P62273	40S ribosomal protein S29	RPS29	4.97415	5.89391
P62277	40S ribosomal protein S13	RPS13	7.71214	10.1877
P62280	40S ribosomal protein S11	RPS11	8.2155	5.93525
P62304	Small nuclear ribonucleoprotein E	SNRPE	9.64186	6.74833
P62306	Small nuclear ribonucleoprotein F	SNRPF	4.12837	4.27864
P62314	Small nuclear ribonucleoprotein Sm D1	SNRPD1	22.9871	7.02279
P62424	60S ribosomal protein L7a	RPL7A	4.62901	4.15195
P62701	40S ribosomal protein S4, X isoform	RPS4X	4.01041	3.47503
P62753	40S ribosomal protein S6	RPS6	3.92414	2.45682
P62829	60S ribosomal protein L23	RPL23	123.938	72.5867
P62851	40S ribosomal protein S25	RPS25	5.7177	8.37323
Q5JNZ5	Putative 40S ribosomal protein S26-like 1	RPS26P11	9.00624	6.58128
P62857	40S ribosomal protein S28	RPS28	11.0917	99.3103
P62888	60S ribosomal protein L30	RPL30	19.0926	16.2774
P62899	60S ribosomal protein L31	RPL31	3.70737	6.93525
P62906	60S ribosomal protein L10a	RPL10A	6.66645	7.84797
P62913	60S ribosomal protein L11	RPL11	3.53767	11.2172
P62917	60S ribosomal protein L8	RPL8	4.5036	5.50508
P63104	14-3-3 protein zeta/delta	YWHAZ	27.9252	32.2737
P63244	Guanine nucleotide-binding protein subunit beta-2-like 1	GNB2L1	48.5541	18.7917
P67809	Nuclease-sensitive element-binding protein 1	YBX1	6.84962	9.84361
P68363	Tubulin alpha-1B chain	TUBA1B	15.6682	2.46741
P78527	DNA-dependent protein kinase catalytic subunit	PRKDC	10.081	3.90603
Q01780	Exosome component 10	EXOSC10	11.2962	17.9328
Q02878	60S ribosomal protein L6	RPL6	3.83497	2.85133
Q03393	6-pyruvoyl tetrahydrobiopterin synthase	PTS	6.59272	2.82124
Q07065	Cytoskeleton-associated protein 4	CKAP4	6.38909	4.81049
Q08211	ATP-dependent RNA helicase A	DHX9	3.64441	2.27058
Q08554	Desmocollin-1	DSC1	2.81489	4.12803
Q09028	Histone-binding protein RBBP4	RBBP4	2.32049	4.21651
Q12873	Chromodomain-helicase-DNA-binding protein 3	CHD3	7.5449	48.0343
Q12906	Interleukin enhancer-binding factor 3	ILF3	3.53733	5.69756
Q12986	Transcriptional repressor NF-X1	NFX1	1645.51	130.133
Q13123	Protein Red	IK	15.2809	2.15135
Q13151	Heterogeneous nuclear ribonucleoprotein A0	HNRNPA0	5.40245	3.27098
Q13200	26S proteasome non-ATPase regulatory subunit 2	PSMD2	4.79799	2.82463
Q13263	Transcription intermediary factor 1-beta	TRIM28	4.52593	6.59272
Q13283	Ras GTPase-activating protein-binding protein 1	G3BP1	28.1301	20.4793
Q13347	Eukaryotic translation initiation factor 3 subunit I	EIF3I	64.9786	8.73716
Q13561	Dynactin subunit 2	DCTN2	6.81108	6.16214
Q13868	Exosome complex component RRP4	EXOSC2	14.9536	21.914
Q13895	Bystin	BYSL	3.03535	8.45999
Q14008	Cytoskeleton-associated protein 5	CKAP5	8.14767	2.81498
Q14011	Cold-inducible RNA-binding protein	CIRBP	4.89939	13.6584
Q14103	Heterogeneous nuclear ribonucleoprotein D0	HNRNPD	4.78008	3.52961
Q14681	BTB/POZ domain-containing protein KCTD2	KCTD2	2.52884	3.49541
Q14684	Ribosomal RNA processing protein 1 homolog B	RRP1B	2.19754	13.4274
Q14692	Ribosome biogenesis protein BMS1 homolog	BMS1	12.5565	6.7668
Q15024	Exosome complex component RRP42	EXOSC7	5.65158	5.96893
Q15046	Lysine--tRNA ligase	KARS	48.1153	24.4305
Q15365	Poly(rC)-binding protein 1	PCBP1	37.0245	11.6771
Q15428	Splicing factor 3A subunit 2	SF3A2	20.9431	5.957
Q15637	Splicing factor 1	SF1	10.5574	8.71159
Q15717	ELAV-like protein 1	ELAVL1	18.1185	5.24081
Q15750	TGF-beta-activated kinase 1 and MAP3K7-binding protein 1	TAB1	4.24278	2.03205
Q16531	DNA damage-binding protein 1	DDB1	5.76122	28.4975
Q16610	Extracellular matrix protein 1	ECM1	2.24483	2.09457
Q2NL82	Pre-rRNA-processing protein TSR1 homolog	TSR1	11.7955	14.5923
Q2TAY7	WD40 repeat-containing protein SMU1	SMU1	5.10269	3.53837
Q3V6T2	Girdin	CCDC88A	18.3878	4.14097
Q5JR04	Putative helicase MOV-10	MOV10	30.324	20.0555
Q5JTH9	RRP12-like protein	RRP12	5.19602	5.16002
Q5QPA5	28S ribosomal protein S18a, mitochondrial	MRPS18A	21.5621	7.519
Q5RKV6	Exosome complex component MTR3	EXOSC6	3.55133	6.70146
Q5T653	39S ribosomal protein L2, mitochondrial	MRPL2	14.7466	3.94241
Q5T749	Keratinocyte proline-rich protein	KPRP	4.10553	2.92344
Q5T750	Skin-specific protein 32	XP32	2.52709	2.05706
Q5T9A4	ATPase family AAA domain-containing protein 3B	ATAD3B	9.79903	8.21344
Q6P158	Putative ATP-dependent RNA helicase DHX57	DHX57	7.27469	3.42456
Q6P1L8	39S ribosomal protein L14, mitochondrial	MRPL14	17.0636	7.95471
Q6PKG0	La-related protein 1	LARP1	24.5098	5.70318
Q6UXV0	GDNF family receptor alpha-like	GFRAL	5.96901	6.15828
X6RLN4	La-related protein 4	LARP4	29.2426	6.62637
Q7KZF4	Staphylococcal nuclease domain-containing protein 1	SND1	7.01037	4.84544
Q7Z2W9	39S ribosomal protein L21, mitochondrial	MRPL21	52.0071	20.4168
Q86UE4	Protein LYRIC	MTDH	4.51779	2.55704
Q86UP2	Kinectin	KTN1	5.12862	2.79021
Q8IUF8	Bifunctional lysine-specific demethylase and histidyl-hydroxylase MINA	MINA	8.81555	7.09181
Q8IXM3	39S ribosomal protein L41, mitochondrial	MRPL41	7.75837	8.63234
Q8IY81	pre-rRNA processing protein FTSJ3	FTSJ3	4.84204	4.68055
Q8N3C0	Activating signal cointegrator 1 complex subunit 3	ASCC3	53.0527	7.98036
Q8NE71	ATP-binding cassette sub-family F member 1	ABCF1	26.786	30.3634
Q8NHQ1	Centrosomal protein of 70 kDa	CEP70	13.0209	2.32928
Q9Y5Q3	Transcription factor MafB	MAFB	135.331	67.8751
Q8TDY2	RB1-inducible coiled-coil protein 1	RB1CC1	14.5919	11.331
Q8WU90	Zinc finger CCCH domain-containing protein 15	ZC3H15	40.1057	31.8186
Q92522	Histone H1x	H1FX	6.39484	20.639
Q92598	Heat shock protein 105 kDa	HSPH1	7.38806	14.3244
Q92615	La-related protein 4B	LARP4B	24.9205	7.26335
Q92665	28S ribosomal protein S31, mitochondrial	MRPS31	2.03929	14.519
Q92900	Regulator of nonsense transcripts 1	UPF1	47.0339	2.09647
Q92979	Ribosomal RNA small subunit methyltransferase NEP1	EMG1	5.73305	6.79168
Q93008	Probable ubiquitin carboxyl-terminal hydrolase FAF-X	USP9X	71.4575	32.203
Q96AG4	Leucine-rich repeat-containing protein 59	LRRC59	3.54342	2.73893
Q96B26	Exosome complex component RRP43	EXOSC8	4.6659	5.91499
Q96GA3	Protein LTV1 homolog	LTV1	8.78573	4.56577
Q96HS1	Serine/threonine-protein phosphatase PGAM5, mitochondrial	PGAM5	14.8123	12.5688
Q96P63	Serpin B12	SERPINB12	7.07465	5.62897
Q96PK6	RNA-binding protein 14	RBM14	33.3824	10.9536
Q96S59	Ran-binding protein 9	RANBP9	4.67765	6.81401
Q99575	Ribonucleases P/MRP protein subunit POP1	POP1	5.57259	18.4986
Q9BQG0	Myb-binding protein 1A	MYBBP1A	4.2099	4.44434
Q9BU76	Multiple myeloma tumor-associated protein 2	MMTAG2	4.97476	4.95779
Q9BVP2	Guanine nucleotide-binding protein-like 3	GNL3	31.7428	33.2878
Q9BWJ5	Splicing factor 3B subunit 5	SF3B5	6.29922	2.4566
Q9BYC9	39S ribosomal protein L20, mitochondrial	MRPL20	8.45322	9.57653
Q9BYD1	39S ribosomal protein L13, mitochondrial	MRPL13	70.6838	23.5553
Q9BYD6	39S ribosomal protein L1, mitochondrial	MRPL1	6.01168	2.03477
Q9BZE4	Nucleolar GTP-binding protein 1	GTPBP4	11.8092	2.48122
Q9H0A0	N-acetyltransferase 10	NAT10	8.01819	6.1645
Q9H0D6	5-3 exoribonuclease 2	XRN2	6.95811	29.2042
Q9H0U6	39S ribosomal protein L18, mitochondrial	MRPL18	11.4832	6.0279
Q9H1I8	Activating signal cointegrator 1 complex subunit 2	ASCC2	29.4846	4.32716
Q9H2U1	ATP-dependent RNA helicase DHX36	DHX36	6.58325	4.39201
Q9H2W6	39S ribosomal protein L46, mitochondrial	MRPL46	19.8093	8.37799
Q9H6S0	Probable ATP-dependent RNA helicase YTHDC2	YTHDC2	3.14292	8.55394
Q9H7D7	WD repeat-containing protein 26	WDR26	12.1935	10.0614
Q9HC36	rRNA methyltransferase 3, mitochondrial	RNMTL1	9.65834	14.7559
Q9HD33	39S ribosomal protein L47, mitochondrial	MRPL47	7.32528	3.12449
Q9NPD3	Exosome complex component RRP41	EXOSC4	4.53799	65.9535
Q9NRX1	RNA-binding protein PNO1	PNO1	21.805	33.0014
Q9NSI2	Protein FAM207A	FAM207A	2.03643	8.68873
Q9NX20	39S ribosomal protein L16, mitochondrial	MRPL16	34.1391	8.09633
Q9NX58	Cell growth-regulating nucleolar protein	LYAR	26.6861	31.8178
Q9NXV2	BTB/POZ domain-containing protein KCTD5	KCTD5	4.1628	2.05595
Q9NY12	H/ACA ribonucleoprotein complex subunit 1	GAR1	7.60317	2.7248
Q9NZI8	Insulin-like growth factor 2 mRNA-binding protein 1	IGF2BP1	15.1196	8.17886
Q9P219	Protein Daple	CCDC88C	18.8675	2.75678
Q9UH99	SUN domain-containing protein 2	SUN2	5.77677	2.6554
Q9ULX3	RNA-binding protein NOB1	NOB1	9.07631	41.9448
Q9UNQ2	Probable dimethyladenosine transferase	DIMT1	13.2953	5.25047
Q9UQ35	Serine/arginine repetitive matrix protein 2	SRRM2	12.6017	11.4871
Q9UQ80	Proliferation-associated protein 2G4	PA2G4	6.16	10.0536
Q9Y265	RuvB-like 1	RUVBL1	7.97559	9.2566
Q9Y295	Developmentally-regulated GTP-binding protein 1	DRG1	26.0155	48.3752
Q9Y3B4	Splicing factor 3B subunit 6	SF3B6	87.0903	4.00582
Q9Y3B7	39S ribosomal protein L11, mitochondrial	MRPL11	36.2678	33.3645
Q9Y3F4	Serine-threonine kinase receptor-associated protein	STRAP	16.1773	2.68821
Q9Y3U8	60S ribosomal protein L36	RPL36	19.8736	42.1484
Q9Y4E8	Ubiquitin carboxyl-terminal hydrolase 15	USP15	19.2195	19.0159
Q9Y5A9	YTH domain-containing family protein 2	YTHDF2	3.12775	5.20642
Q9Y6Y0	Influenza virus NS1A-binding protein	IVNS1ABP	18.971	2.22308
